# Supplementary material for: Construction of 2,3,4,5-tetrahydro-1,2,4-triazines via [4 + 2] cycloaddition of α-halogeno hydrazones to imines
Source: Royal Society of Chemistry journal article supplement (doi:10.1039/c6ra27767e), 2017-01-01
Supplement: c6ra27767e1.pdf [file c6ra27767e1.pdf]

## Supporting Information

### Construction of 2,3,4,5-tetrahydro-1,2,4-triazines via [4+2] cycloaddition of $\alpha$ -halogeno hydrazones with imines

Hong-Wu Zhao,\* Hai-Liang Pang, Yu-Di Zhao, Yue-Yang Liu, Li-Jiao Zhao,\* Xiao-Qin Chen,  
Xiu-Qing Song, Ning-Ning Feng and Juan Du

College of Life Science and Bio-engineering, Beijing University of Technology, Beijing 100124,  
P.R. China; *Phone: 86-10-6739-6211; Fax: 86-10-6739-6211; Email: hwzhao@bjut.edu.cn;*  
*zhaolijiao@bjut.edu.cn.*

### Table of Contents

|                                                      |    |
|------------------------------------------------------|----|
| 1. $^1\text{H}$ and $^{13}\text{C}$ NMR spectra..... | 2  |
| 2. X-Ray crystal data of compound <b>3aa</b> .....   | 31 |

# 1. $^1\text{H}$ and $^{13}\text{C}$ NMR spectra

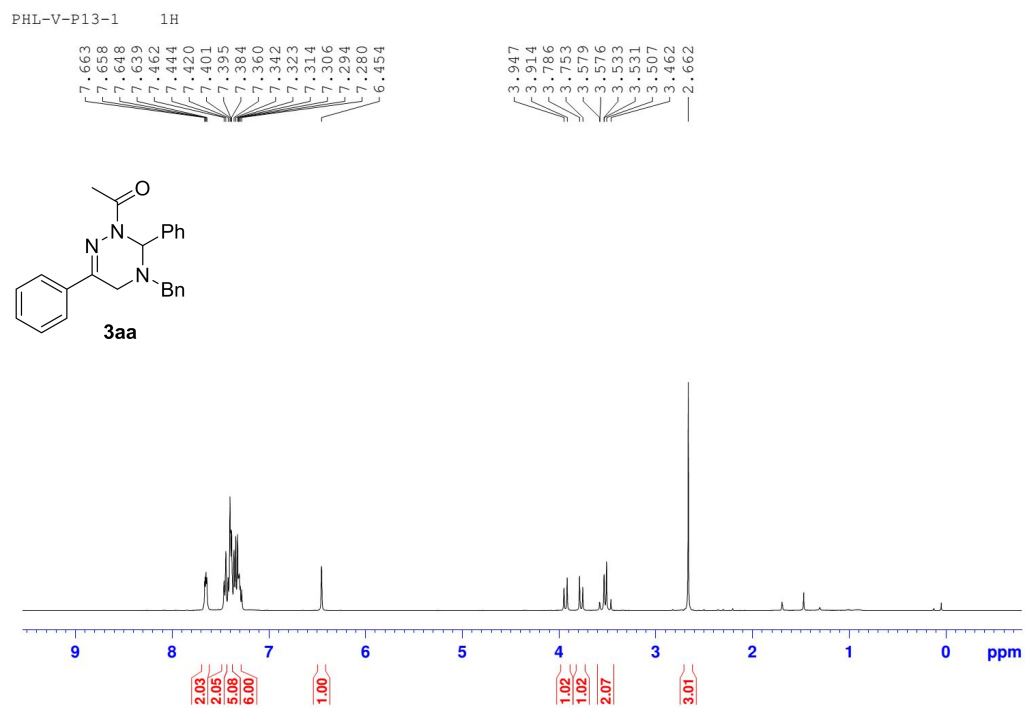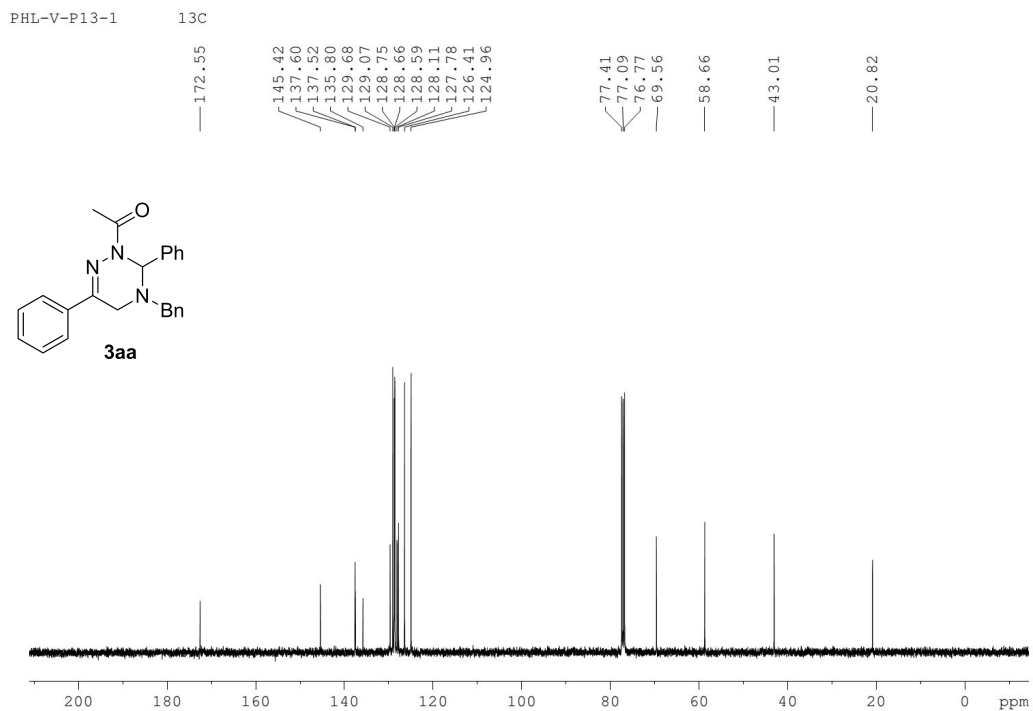

PHL-V-P17-4 NEW 1H

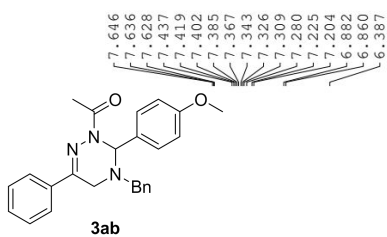

7.646  
7.636  
7.628  
7.437  
7.419  
7.402  
7.385  
7.367  
7.343  
7.326  
7.309  
7.280  
7.225  
7.204  
6.882  
6.860  
6.387

3.917  
3.884  
3.787  
3.748  
3.715  
3.554  
3.502  
3.456

— 2.634

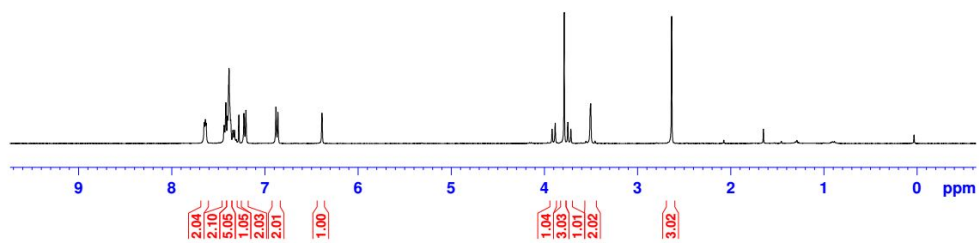

PHL-V-P17-4 13C

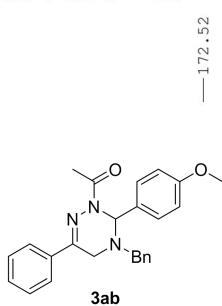

— 172.52  
— 159.45  
145.41  
137.69  
135.83  
129.67  
129.55  
129.04  
128.65  
128.59  
127.75  
127.63  
124.95  
114.14

77.45  
77.14  
76.82  
— 69.32

— 58.51  
— 55.29

— 42.89

— 20.85

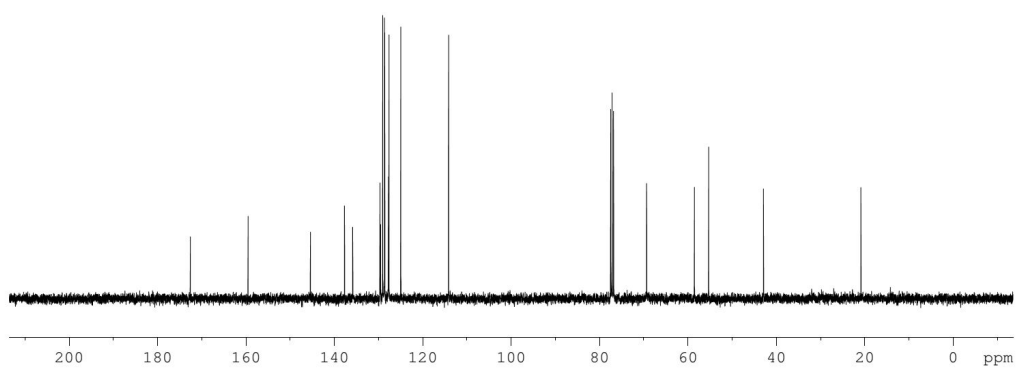

PHL-V-P17-5 NEW 1H

8.217  
7.643  
7.629  
7.623  
7.493  
7.472  
7.423  
7.416  
7.409  
7.391  
7.378  
7.371  
7.357  
7.280  
6.452

3.933  
3.900  
3.812  
3.780  
3.639  
3.592  
3.439  
3.393  
—2.663

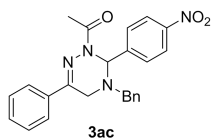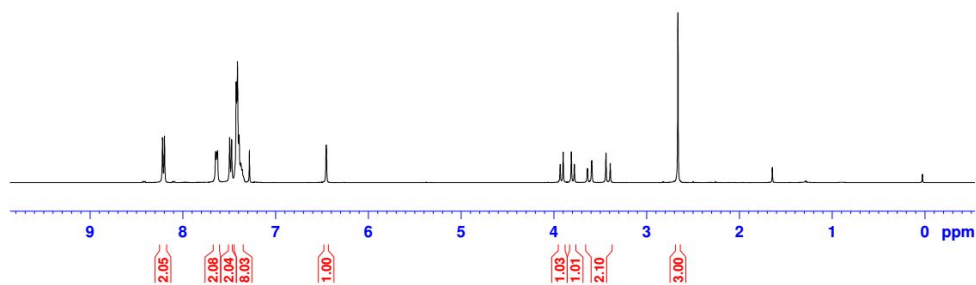

PHL-V-P17-5 13C

—172.67  
147.88  
145.66  
144.94  
136.94  
135.24  
130.05  
129.10  
128.81  
128.69  
128.10  
127.66  
124.94  
124.01

77.40  
77.08  
76.76  
—68.55  
—58.85  
—43.17  
—20.75

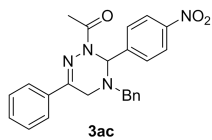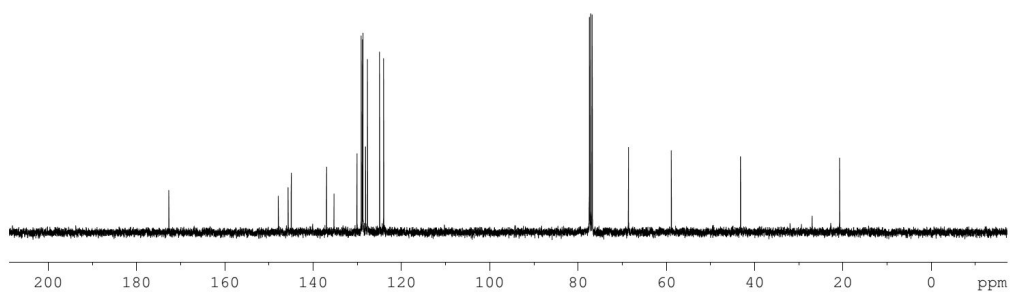

PHL-V-P17-6 NEW 1H

8.196  
8.176  
8.156  
7.650  
7.638  
7.630  
7.606  
7.554  
7.534  
7.514  
7.449  
7.432  
7.410  
7.396  
7.380  
7.375  
7.358  
7.280  
6.462  
  
3.950  
3.918  
3.821  
3.788  
3.649  
3.603  
3.452  
3.406  
— 2.676

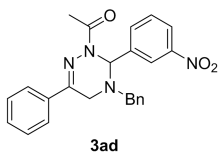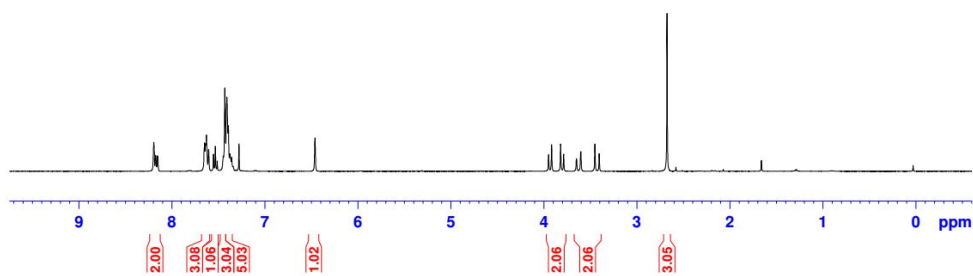

PHL-V-P17-6 13C

— 172.75  
148.85  
145.70  
140.11  
136.92  
135.28  
132.71  
130.04  
129.86  
129.15  
128.83  
128.69  
128.10  
125.00  
123.31  
121.86  
  
77.43  
77.11  
76.79  
— 68.40  
— 58.82  
— 43.00  
— 20.78

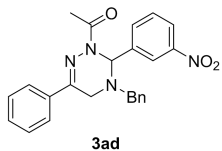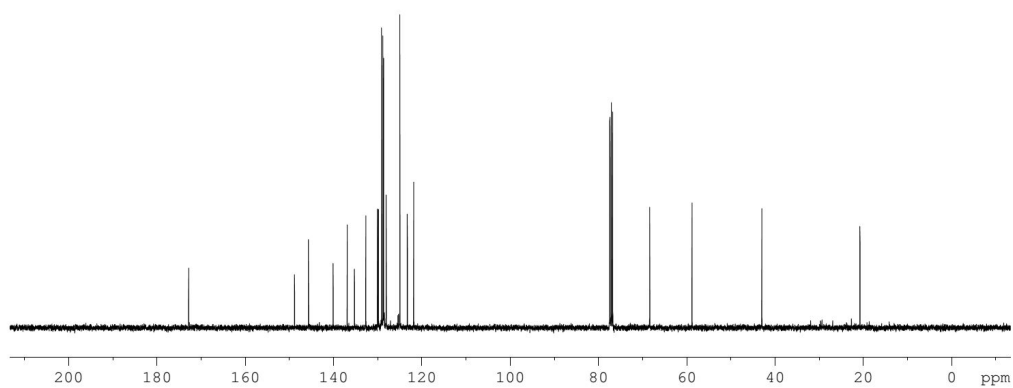

PHL-V-P17-7 NEW 1H

7.882  
7.878  
7.866  
7.859  
7.562  
7.546  
7.542  
7.505  
7.491  
7.486  
7.477  
7.468  
7.463  
7.448  
7.397  
7.380  
7.361  
7.345  
7.327  
7.306  
7.279  
7.274  
7.271  
7.255  
7.235  
7.050  
7.043  
7.028  
4.090  
4.058  
3.940  
3.508  
3.426  
3.423  
3.380  
3.377  
2.960  
2.914  
2.657

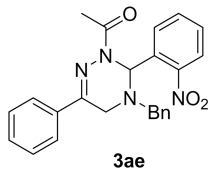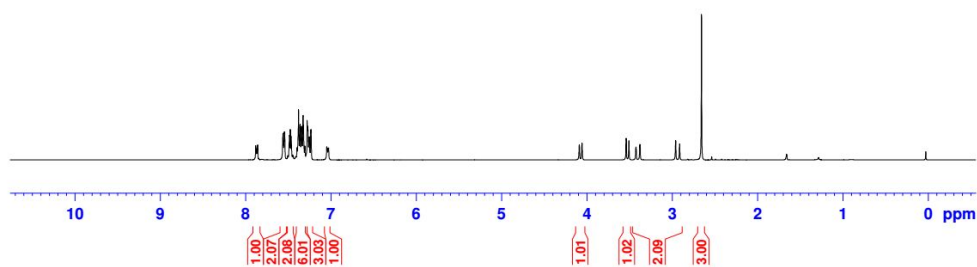

PHL-V-P17-7 13C

172.59  
149.21  
145.25  
137.04  
135.33  
132.31  
131.73  
129.95  
129.37  
129.21  
128.68  
128.60  
127.89  
127.19  
125.52  
124.95  
77.44  
77.12  
76.80  
68.07  
58.98  
40.35  
20.90

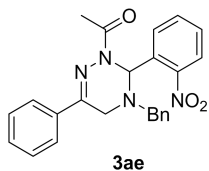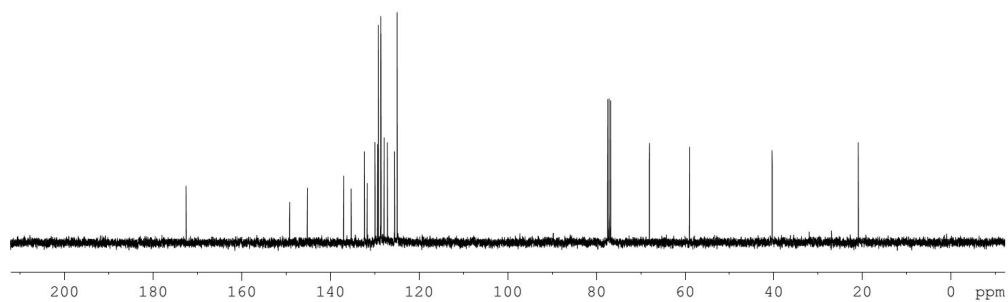

PHL-V-P19-7 NEW 1H

7.652  
7.648  
7.639  
7.629  
7.490  
7.469  
7.436  
7.417  
7.401  
7.394  
7.382  
7.361  
7.345  
7.328  
7.280  
7.199  
7.179  
6.377

3.921  
3.888  
3.773  
3.740  
3.585  
3.539  
3.484  
3.438  
— 2.648

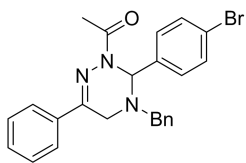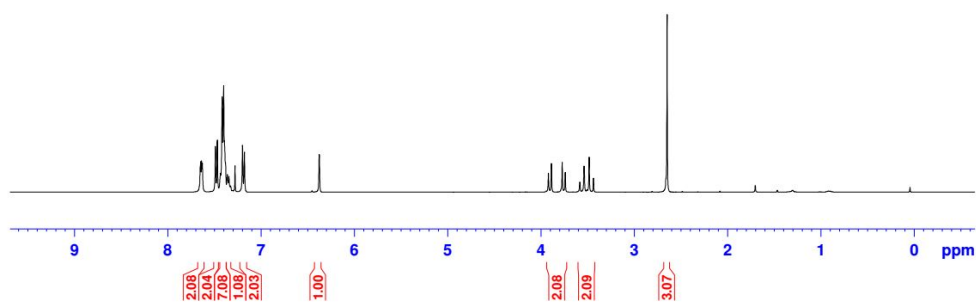

PHL-V-P19-7 13C

— 172.57

145.54  
137.35  
136.71  
135.56  
131.93  
129.86  
129.08  
128.74  
128.66  
128.32  
127.92  
124.96  
122.18

77.47  
77.15  
76.83  
— 68.94  
— 58.67

— 43.00

— 20.82

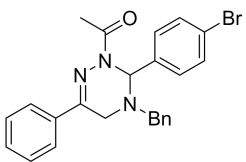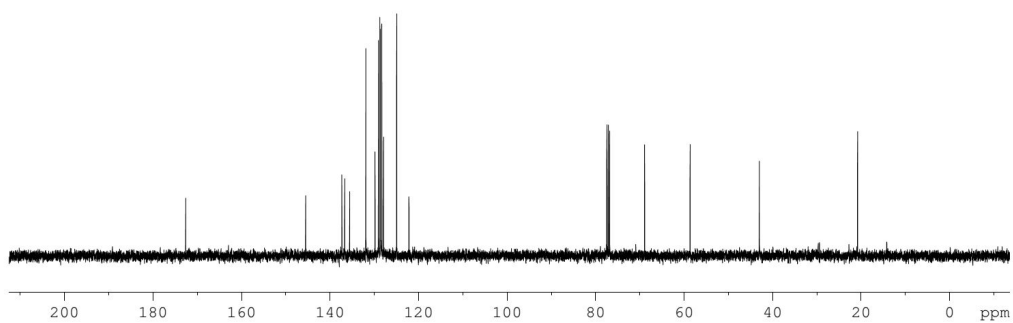

PHL-V-P19-4 NEW 1H

7.885  
7.864  
7.848  
7.838  
7.823  
7.805  
7.796  
7.653  
7.643  
7.634  
7.593  
7.562  
7.500  
7.483  
7.464  
7.445  
7.427  
7.408  
7.388  
7.383  
7.376  
7.361  
7.343  
7.280  
6.604

4.000  
3.967  
3.832  
3.799  
3.593  
3.547  
3.517  
3.472  
— 2.728

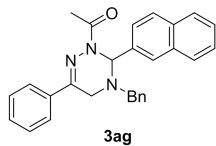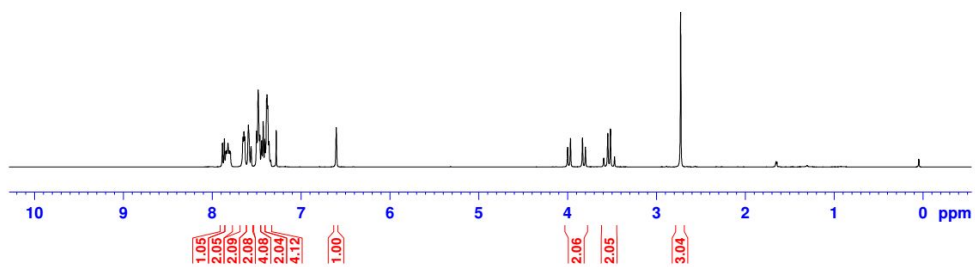

PHL-V-P19-4 13C

172.64  
145.56  
137.61  
135.80  
134.91  
133.28  
133.20  
129.74  
129.17  
128.86  
128.74  
128.62  
128.28  
127.88  
127.64  
126.24  
126.19  
125.19  
125.00  
124.59

77.47  
77.16  
76.84  
69.73  
— 58.76  
— 43.17  
— 20.96

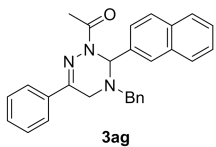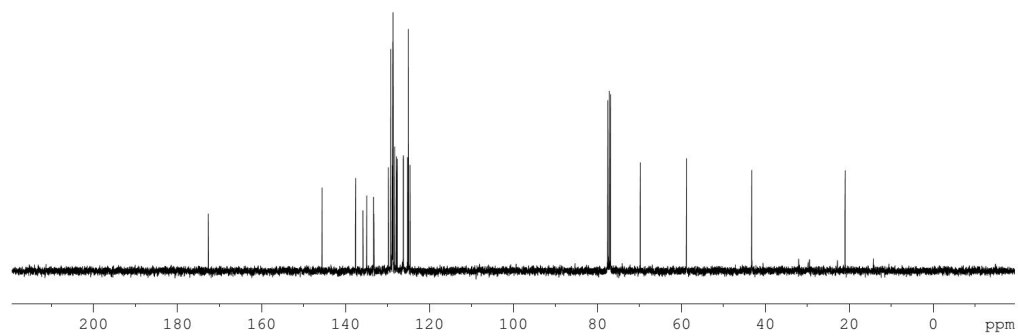



PHL-V-P19-5 1H

7.705  
7.699  
7.690  
7.682  
7.427  
7.411  
7.386  
7.367  
7.352  
7.335  
7.280  
6.458  
6.344  
6.337  
6.332  
6.263  
6.255  
3.866  
3.852  
3.827  
3.793  
3.683  
— 2.562

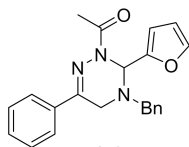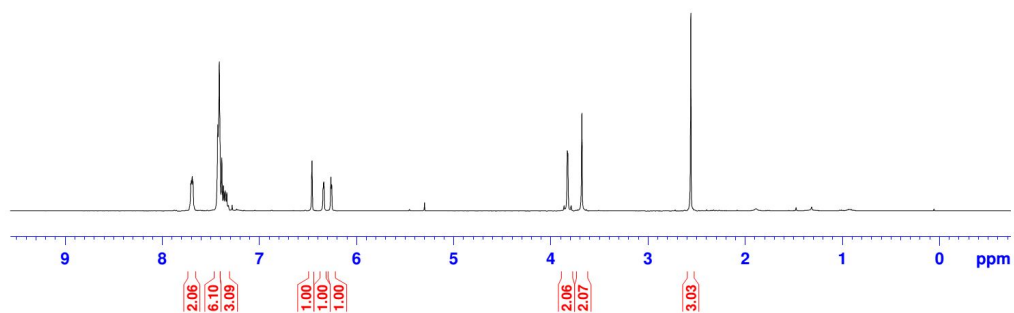

PHL-V-P19-5 13C

171.86  
150.23  
144.96  
142.87  
136.97  
135.62  
129.75  
129.03  
128.67  
128.63  
127.84  
125.03  
110.30  
108.55  
77.47  
77.15  
76.83  
63.98  
58.22  
44.00  
— 20.94

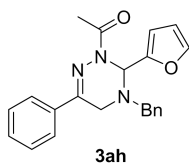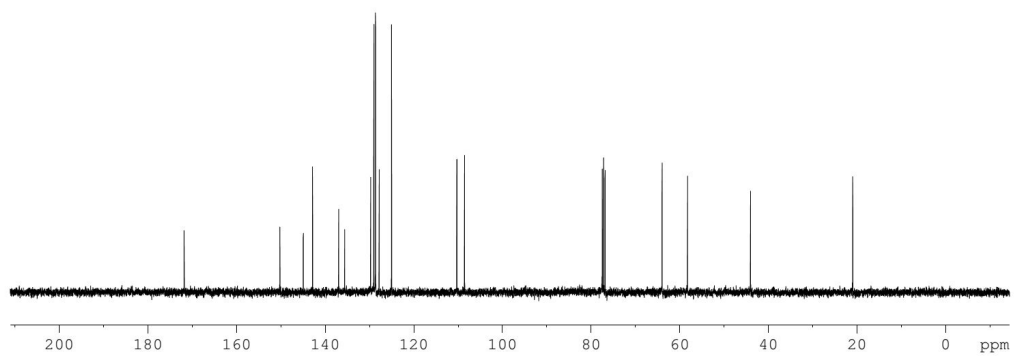

PHL-V-P17-3 NEW 1H

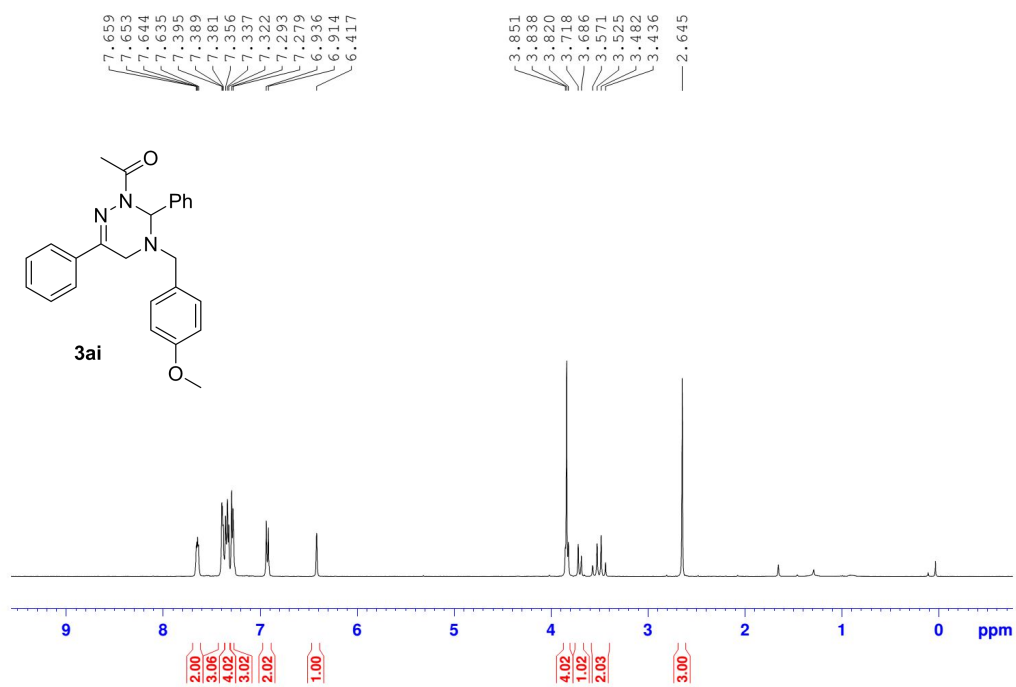

PHL-V-P17-3 13C

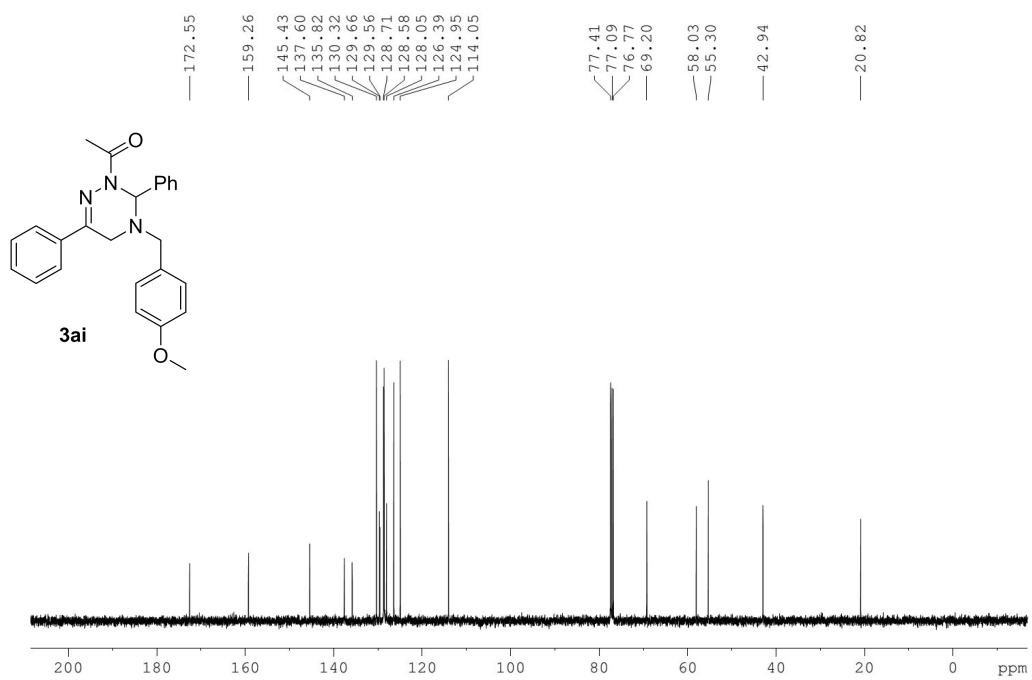

PHL-V-P17-2 NEW 1H

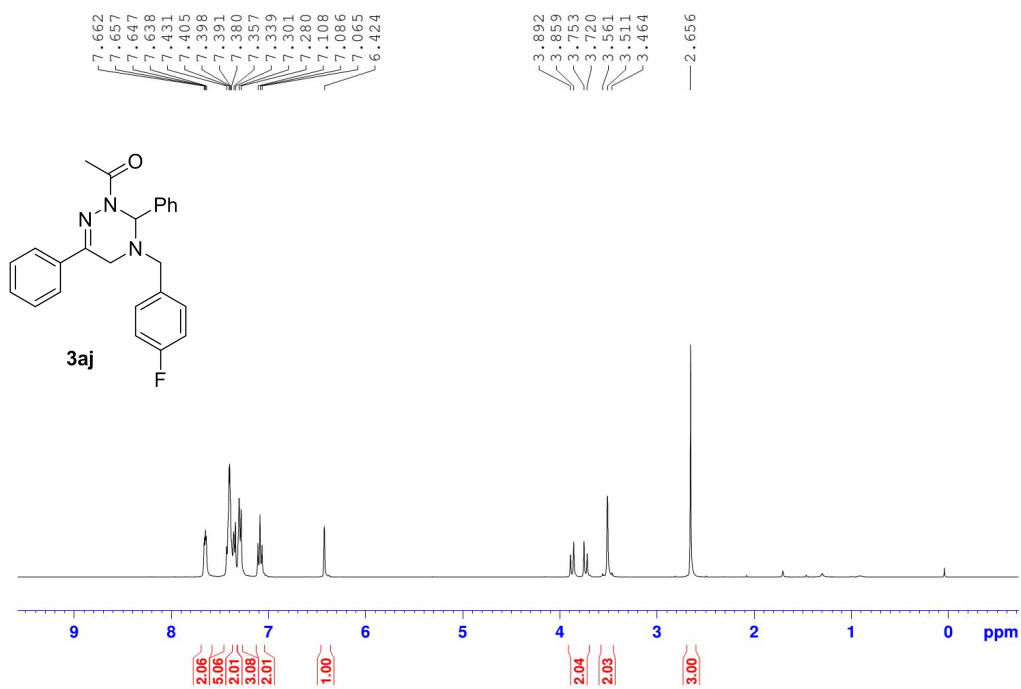

PHL-V-P17-2

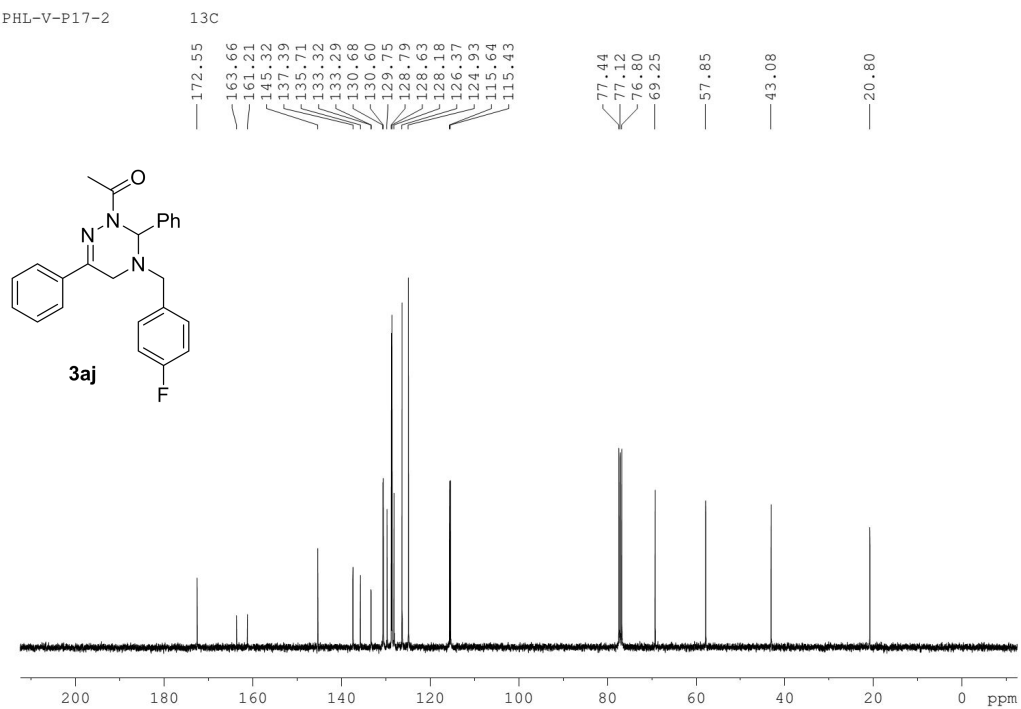

PHL-V-P17-1 NEW 1H

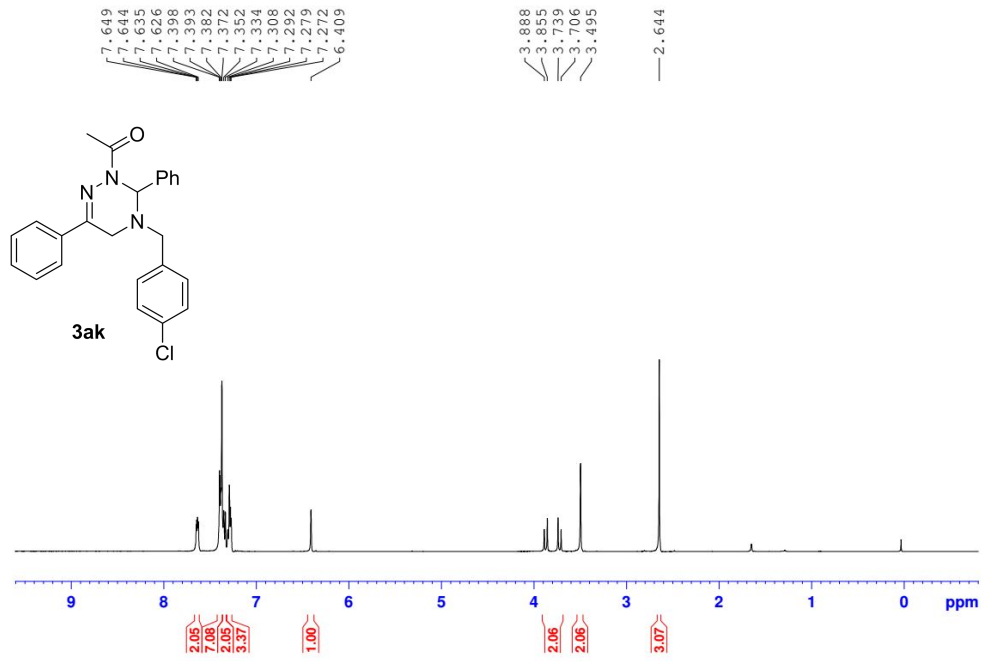

PHL-V-P17-1 13C

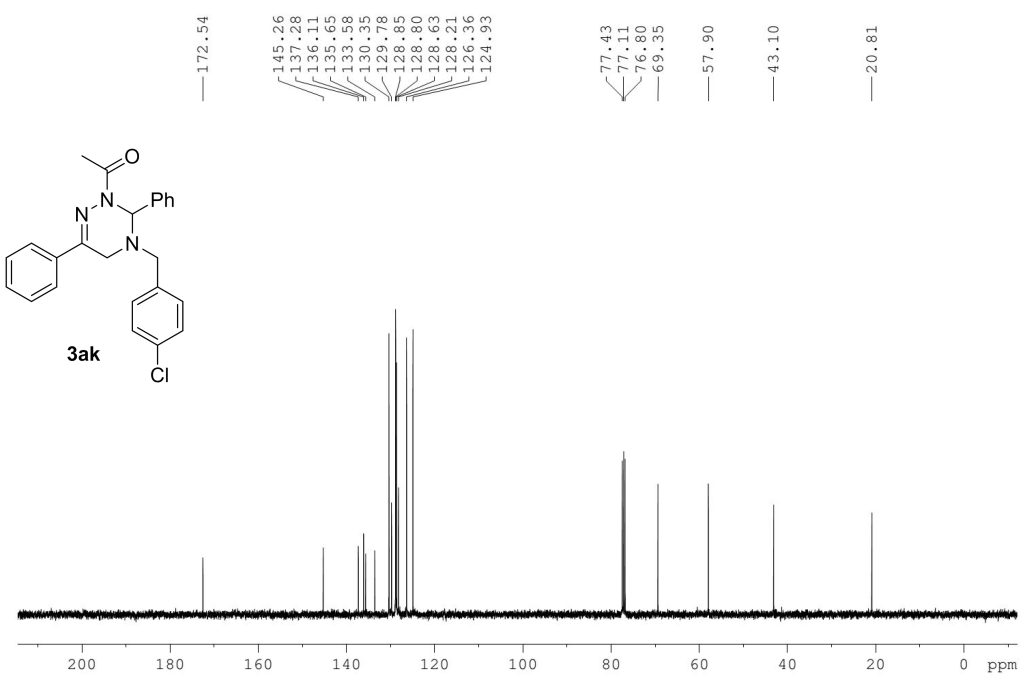

PHL-V-P19-2 NEW 1H

7.694  
7.685  
7.681  
7.676  
7.670  
7.607  
7.399  
7.391  
7.366  
7.349  
7.331  
7.308  
7.283  
7.266  
6.353

3.551  
3.506  
3.451  
3.449  
3.406  
3.403  
2.613  
2.605

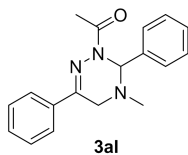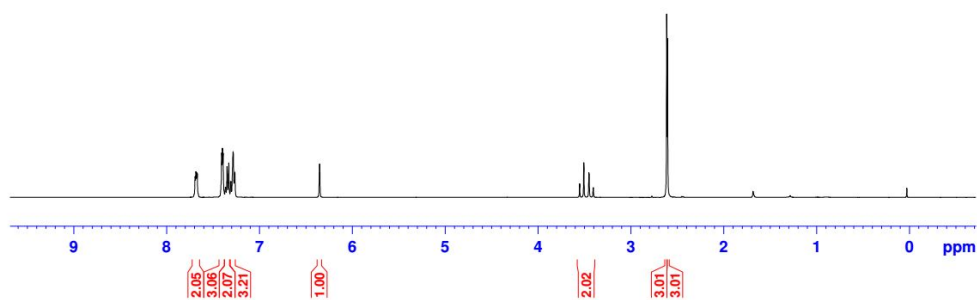

PHL-V-P19-2 13C

172.69

145.03  
137.26  
135.85  
129.66  
128.74  
128.57  
128.17  
126.39  
124.90

77.39  
77.07  
76.76  
71.29

45.12  
42.70

20.70

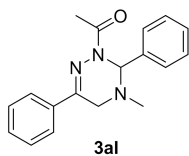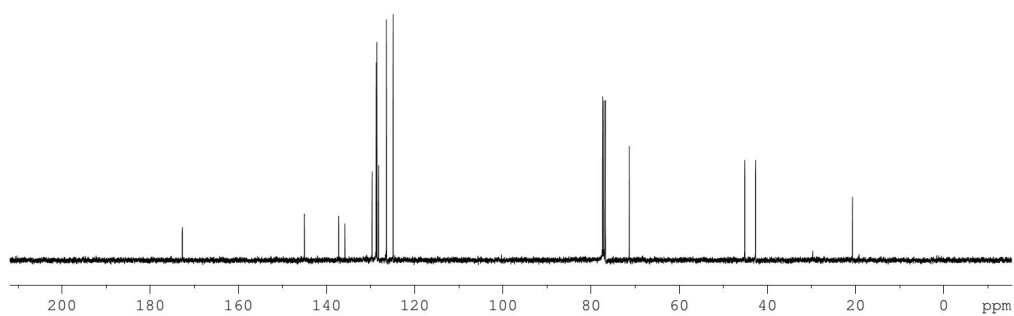

PHL-V-P19-1 NEW 1H

7.735  
7.729  
7.724  
7.720  
7.711  
7.711  
7.424  
7.416  
7.408  
7.370  
7.357  
7.340  
7.319  
7.298  
7.280  
7.109  
7.089  
7.022  
7.004  
6.985

4.415  
4.412  
4.370  
4.366  
4.003  
3.957

— 2.579

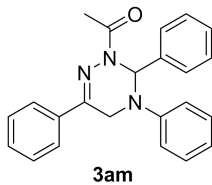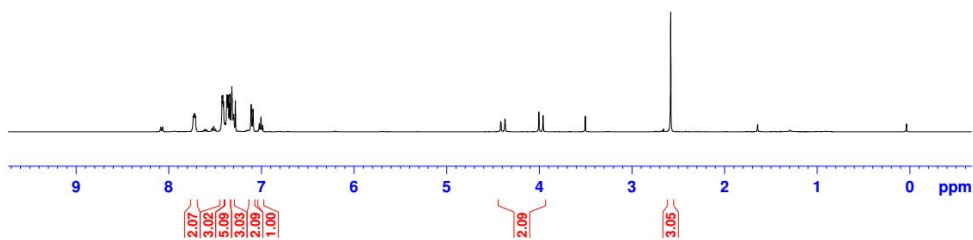

PHL-V-P19-1 13C

— 171.84

148.82  
146.07  
136.63  
135.06  
129.91  
129.68  
128.95  
128.67  
128.63  
128.39  
128.15  
126.24  
125.00  
121.74  
117.94

77.38  
77.07  
76.75  
— 67.58

— 43.46

— 32.62

— 20.78

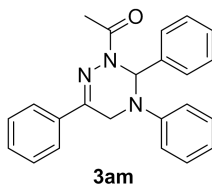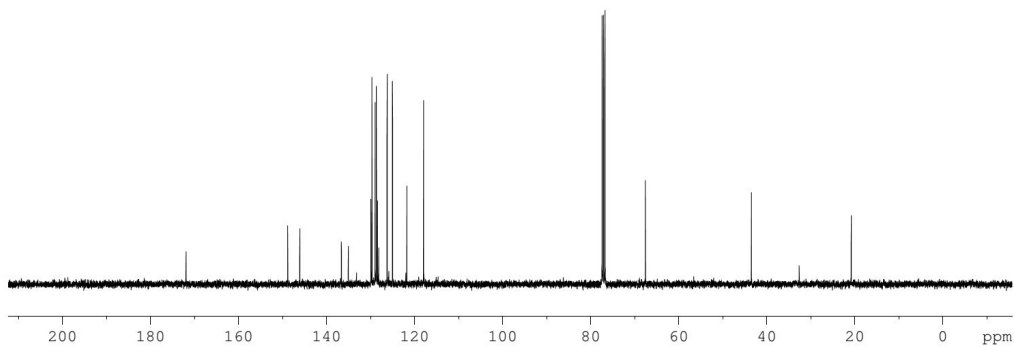

PHL-V-P13-2 NEW 1H

7.603  
7.581  
7.452  
7.435  
7.412  
7.394  
7.375  
7.350  
7.332  
7.316  
7.300  
7.280  
6.910  
6.888  
6.437

3.937  
3.905  
3.838  
3.771  
3.738  
3.537  
3.491  
3.461  
3.416  
— 2.640

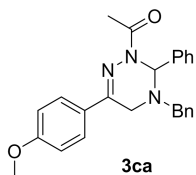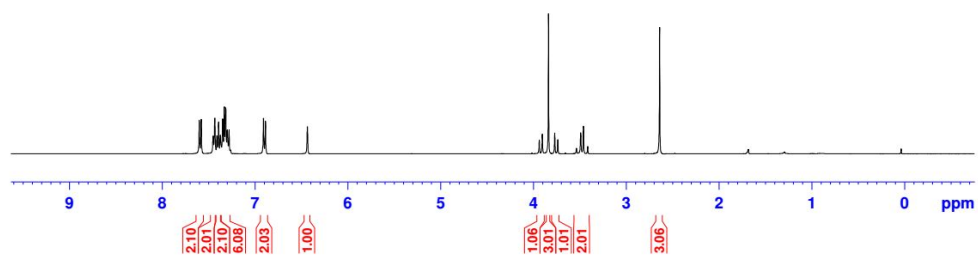

PHL-V-P13-2 13C

172.44  
160.88  
145.18  
137.68  
137.58  
129.08  
128.72  
128.64  
128.46  
128.05  
127.75  
126.44  
126.41  
113.94

77.42  
77.10  
76.78  
69.45  
58.63  
55.38  
42.99  
20.83

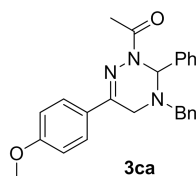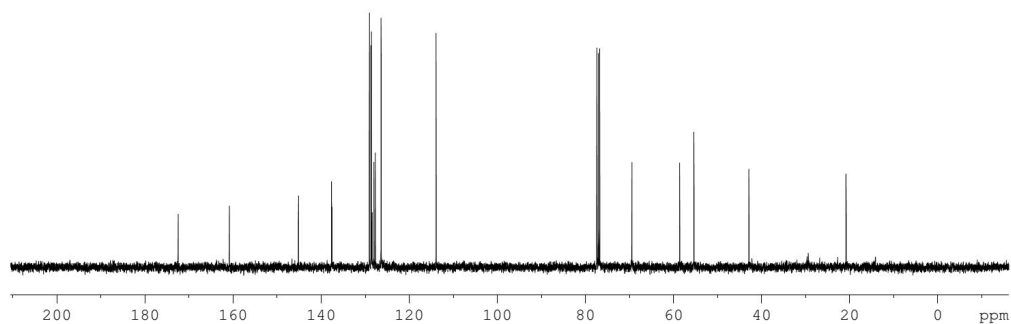

PHL-V-P13-3 NEW 1H

7.555  
7.535  
7.458  
7.441  
7.417  
7.399  
7.380  
7.355  
7.337  
7.322  
7.306  
7.288  
7.280  
7.204  
7.184  
6.449

3.944  
3.911  
3.778  
3.746  
3.557  
3.511  
3.482  
3.436  
2.654  
2.388

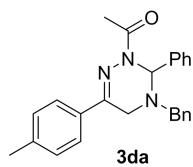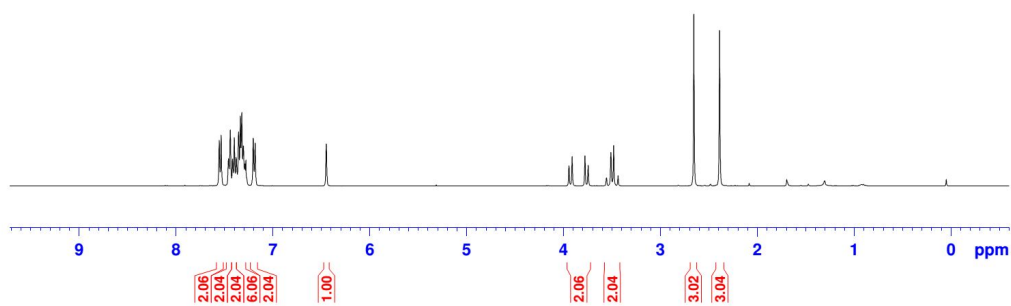

PHL-V-P13-3 13C

172.54  
145.51  
139.90  
137.66  
137.57  
133.07  
129.28  
129.09  
128.74  
128.66  
128.08  
127.77  
126.44  
124.90  
77.44  
77.12  
76.80  
69.53  
58.65  
42.98  
21.36  
20.85

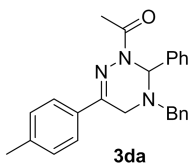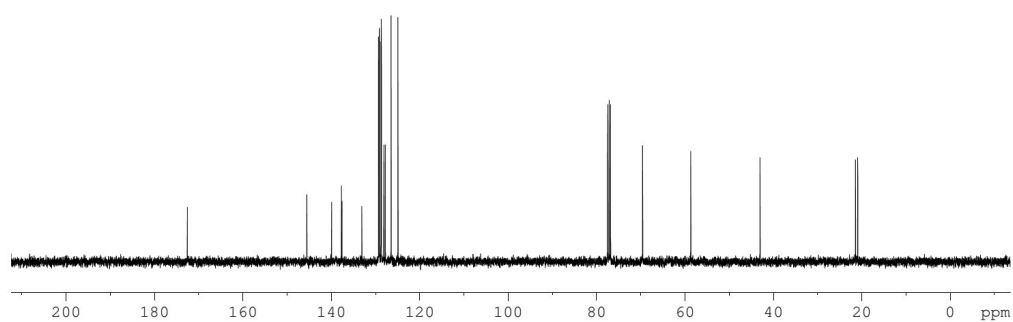



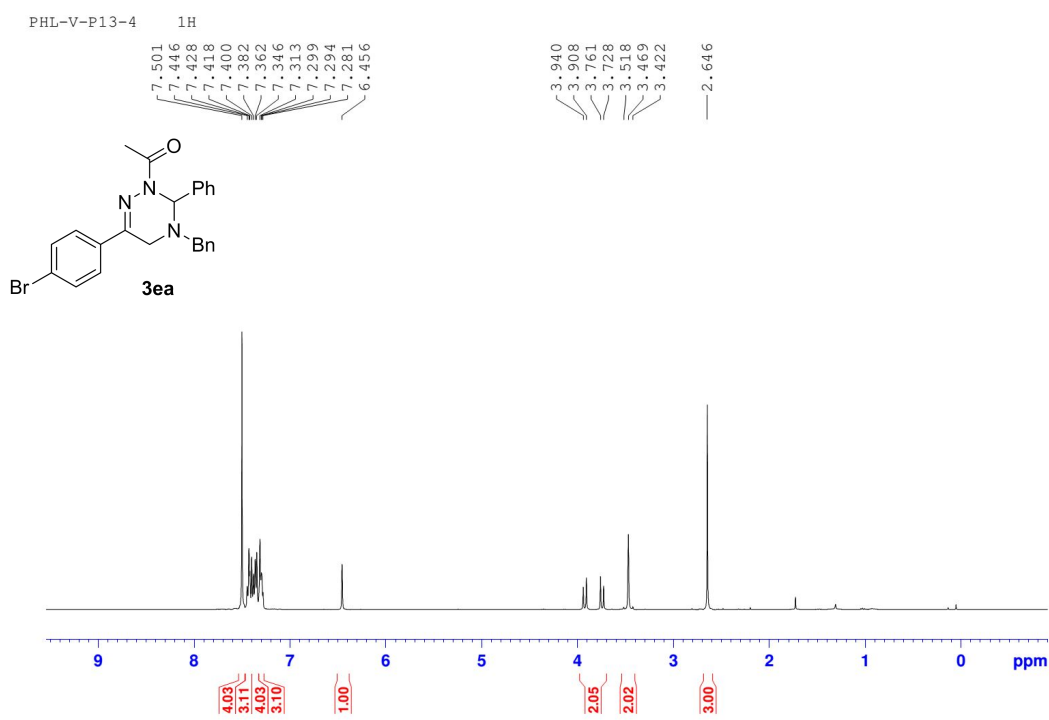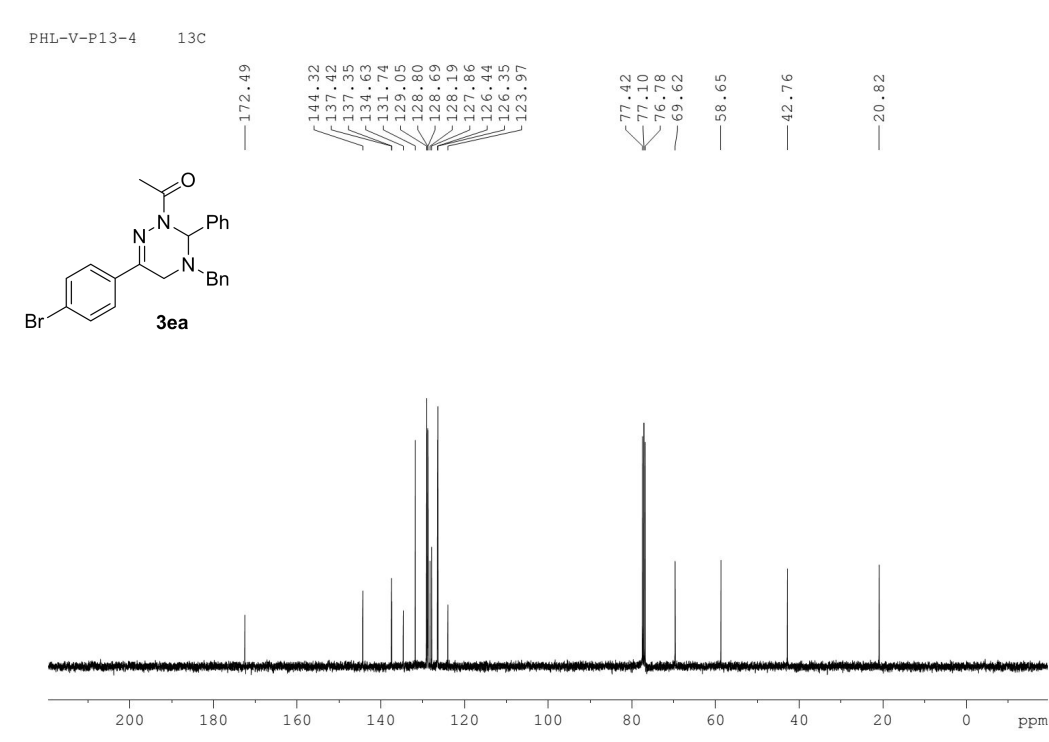

PHL-V-P13-5 NEW 1H

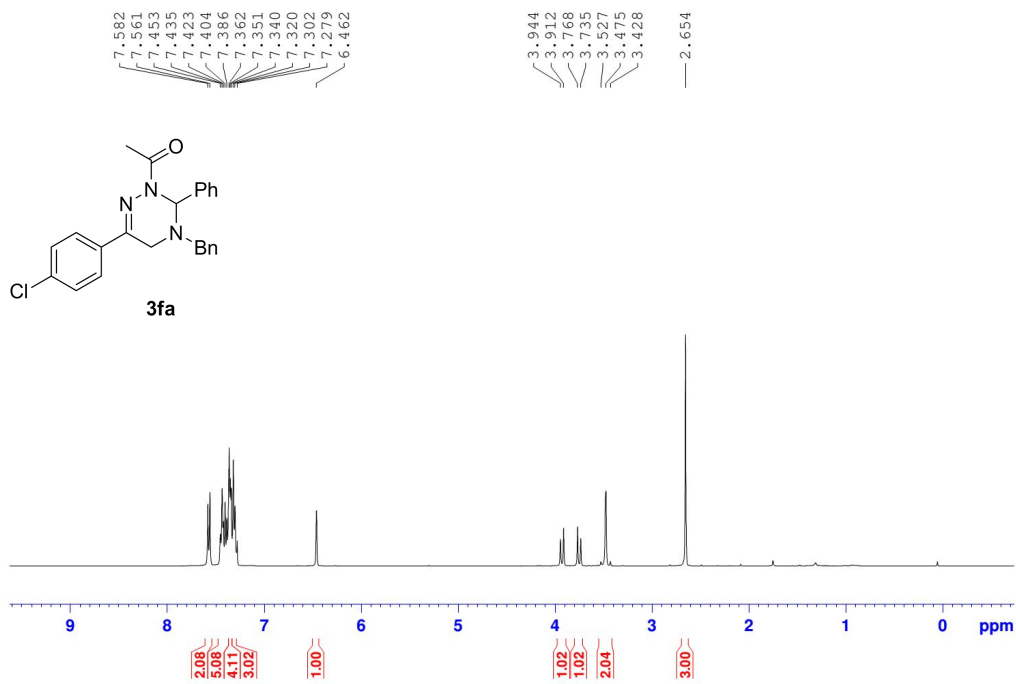

PHL-V-P13-5 13C

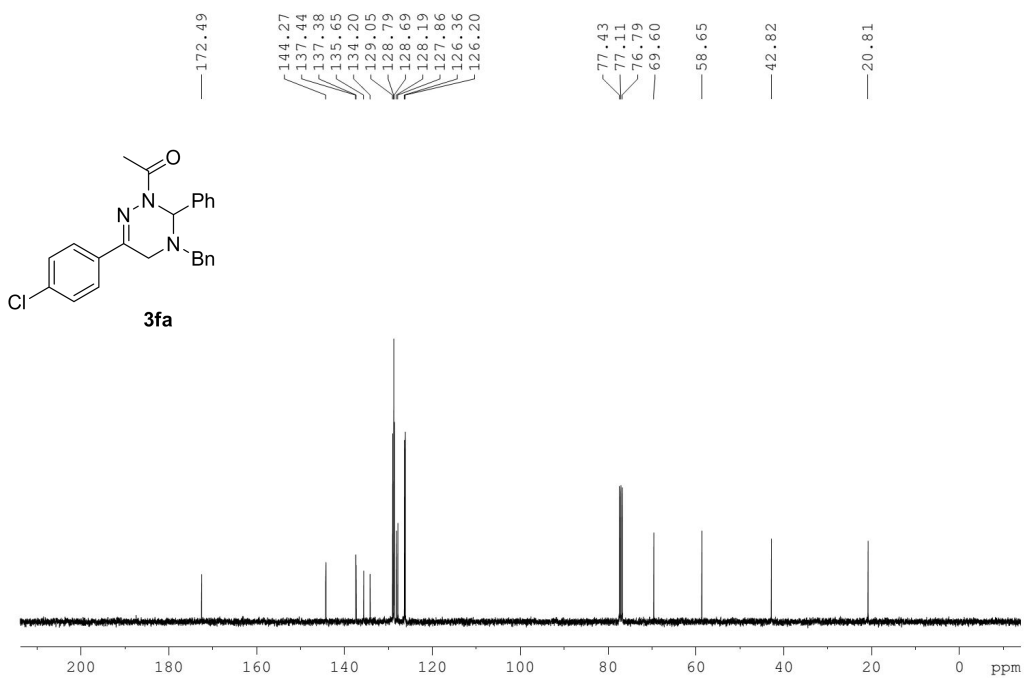

PHL-V-P13-6 NEW 1H

7.637  
7.623  
7.615  
7.601  
7.445  
7.428  
7.414  
7.395  
7.376  
7.355  
7.338  
7.309  
7.291  
7.279  
7.086  
7.064  
7.043  
6.441

3.937  
3.905  
3.763  
3.730  
3.525  
3.477  
3.468  
3.423  
— 2.637

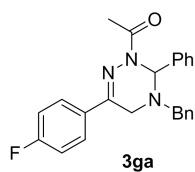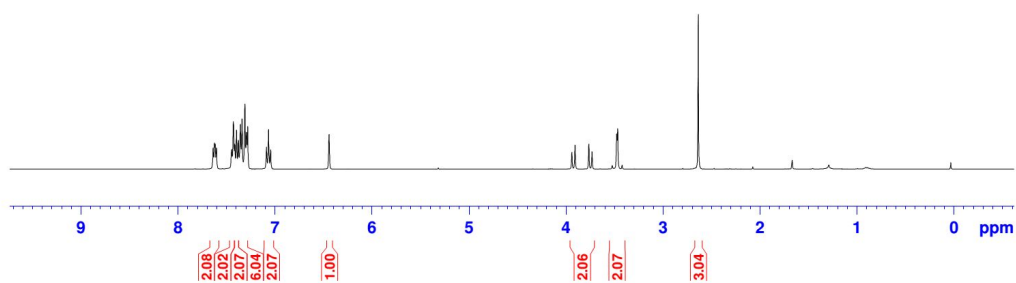

PHL-V-P13-6 13C

172.47  
164.90  
162.41  
144.43  
137.50  
137.42  
131.99  
131.96  
129.05  
128.78  
128.69  
128.16  
127.84  
126.90  
126.82  
126.38  
115.71  
115.49

77.41  
77.10  
76.78  
69.50  
58.65  
42.94  
20.80

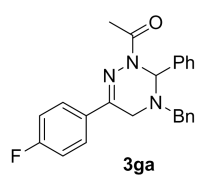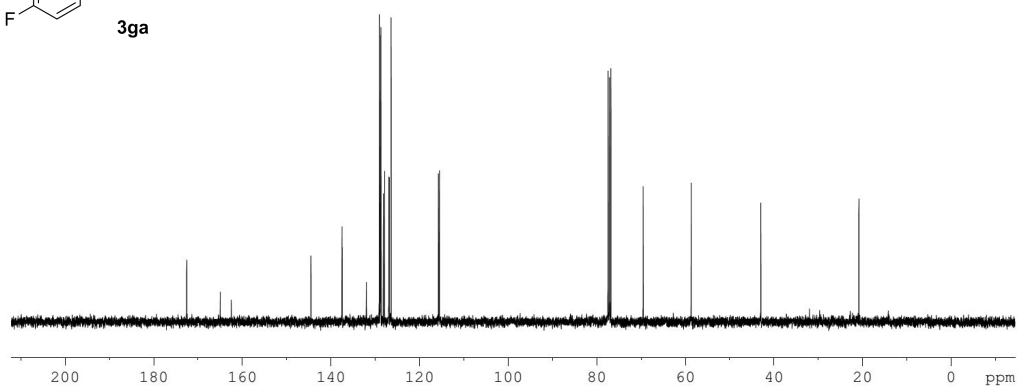

PHL-V-P13-7 NEW 1H

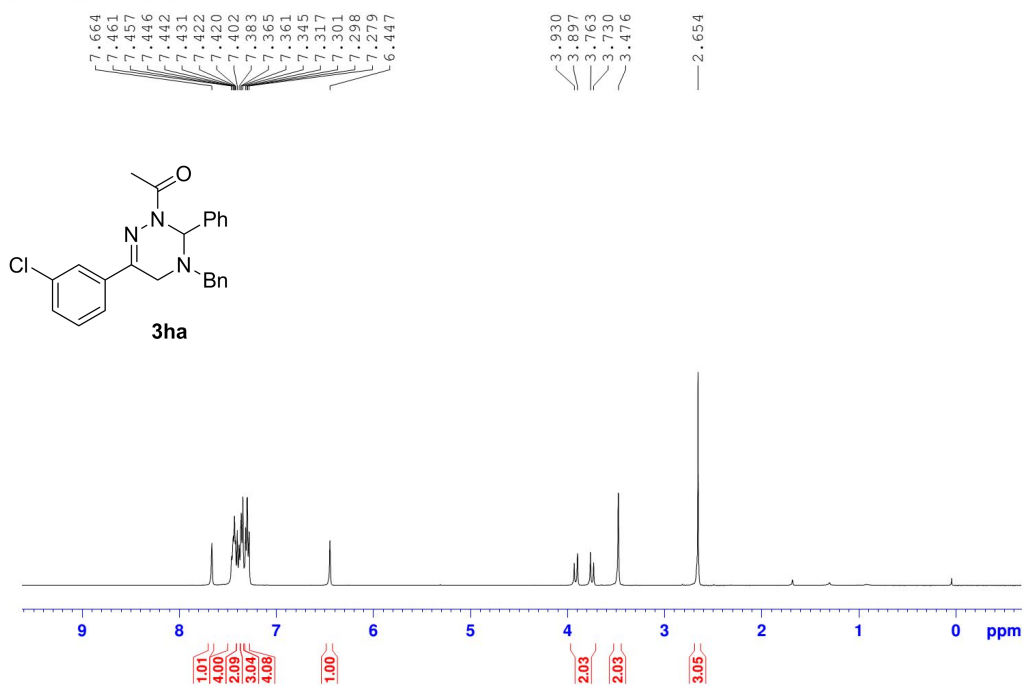

PHL-V-P13-7 13C

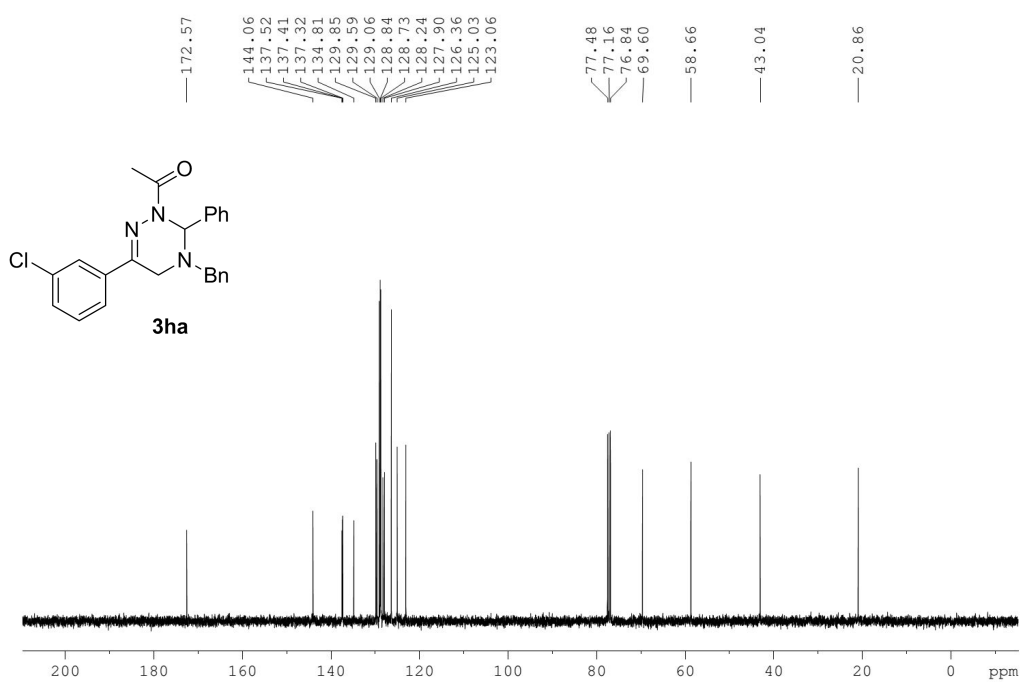

PHL-V-P13-9 NEW 1H

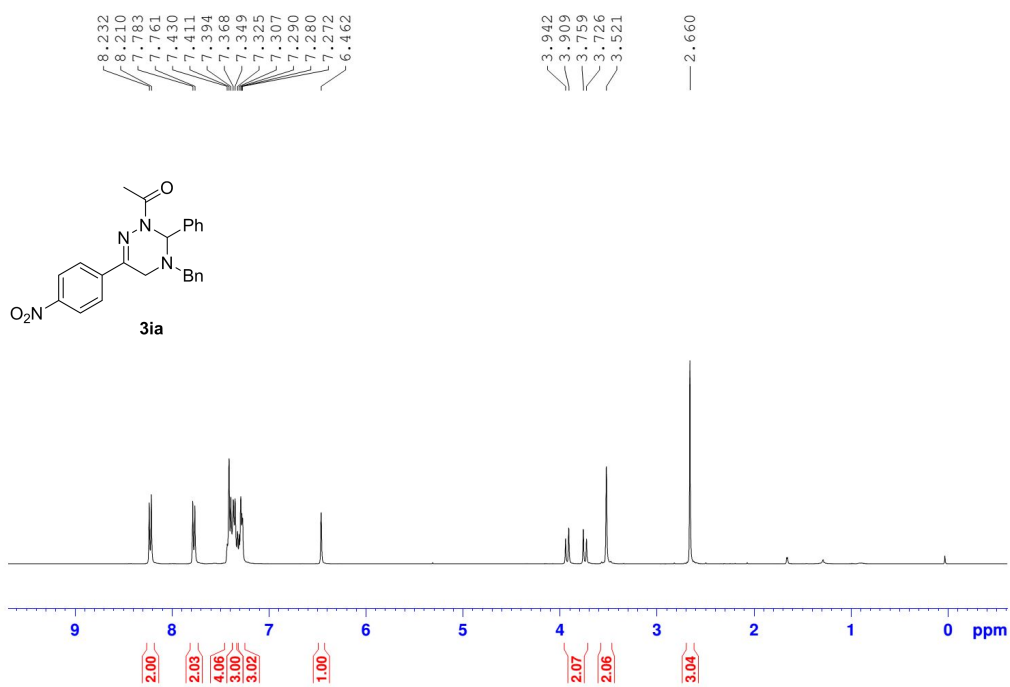

PHL-V-P13-9 13C

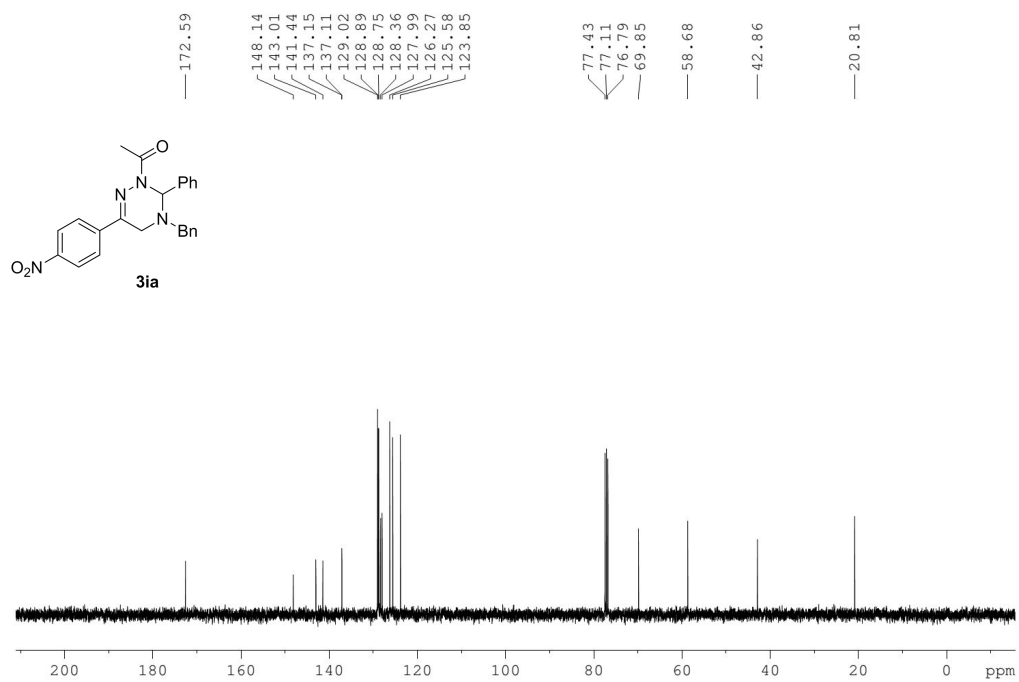

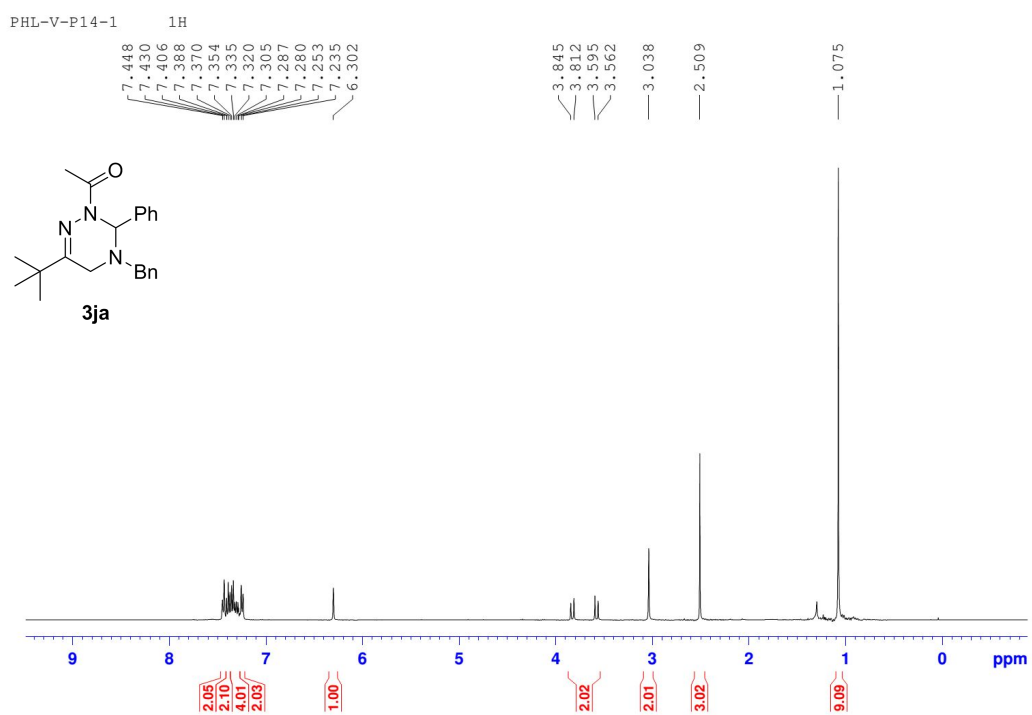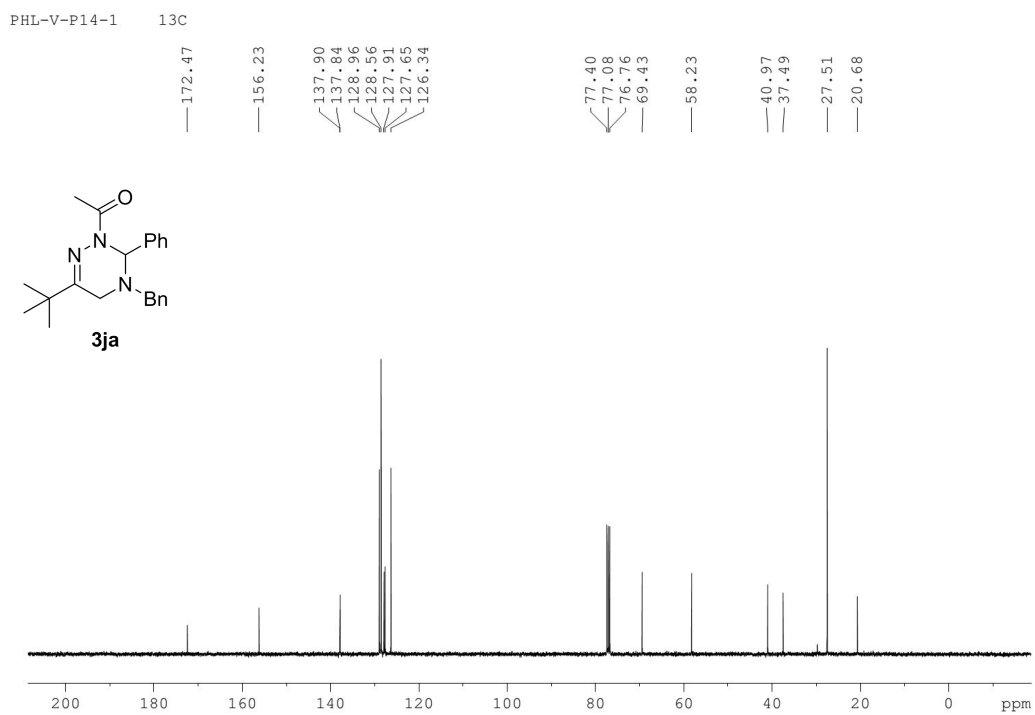

PHL-V-P14-2 NEW 1H

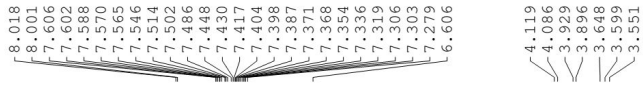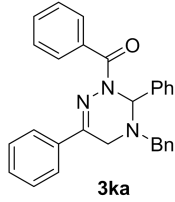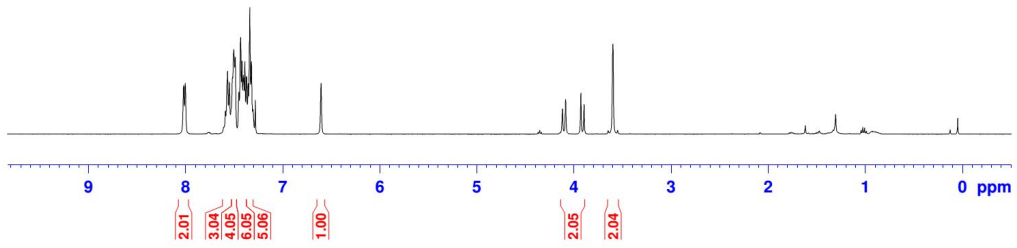

PHL-V-P14-2 13C

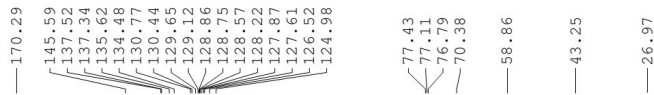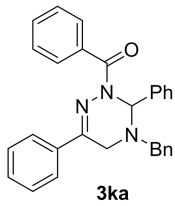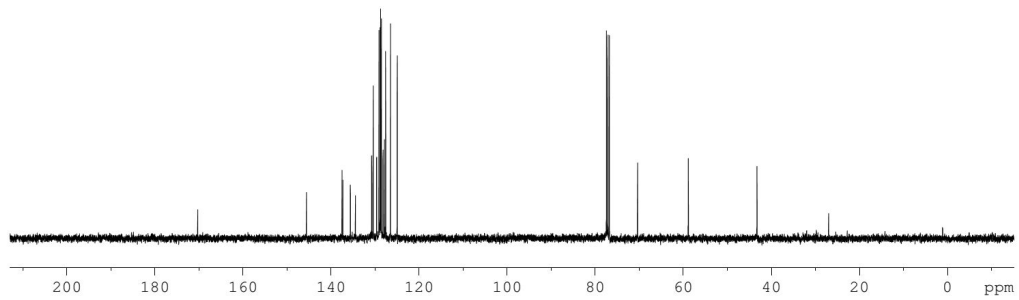

PHL-V-P14-4 NEW 1H

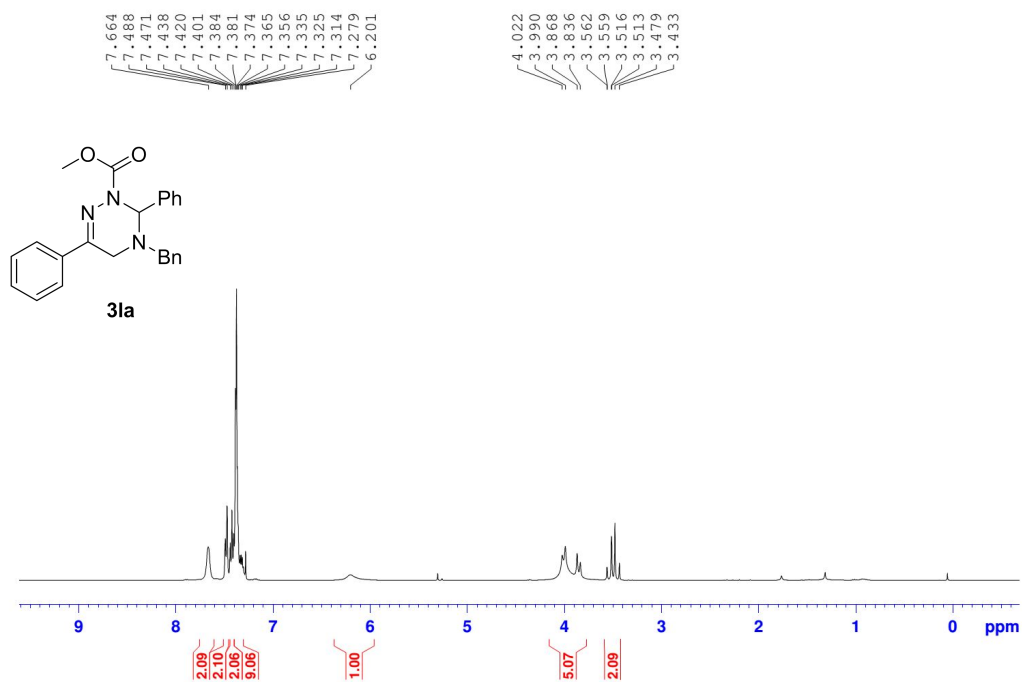

PHL-V-P14-4 NEW 13C

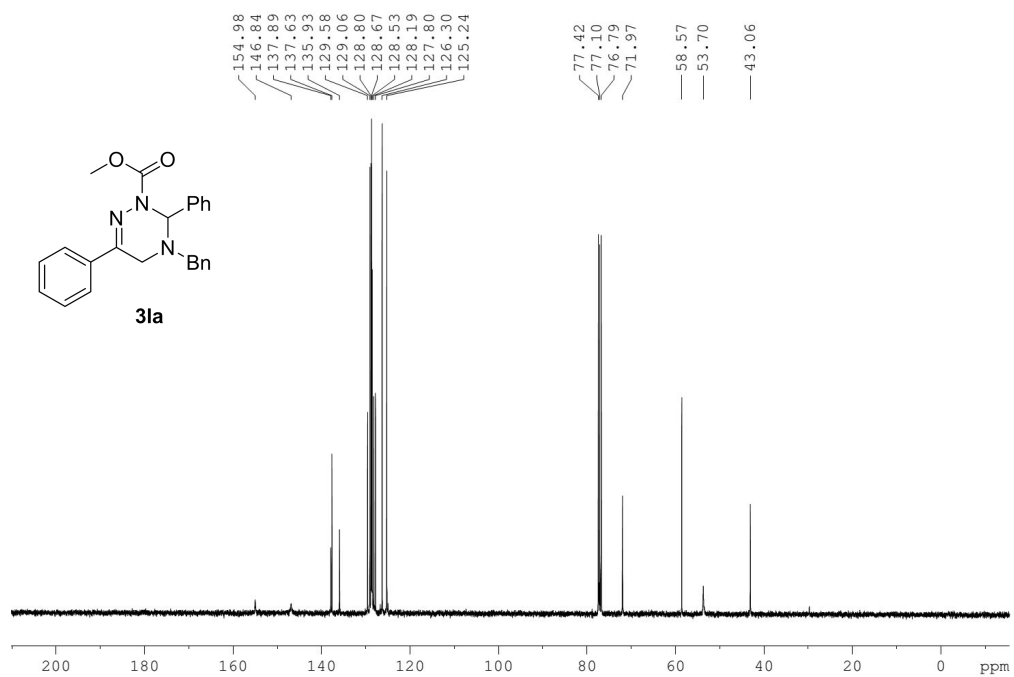



PHL-V-P14-5 NEW 1H

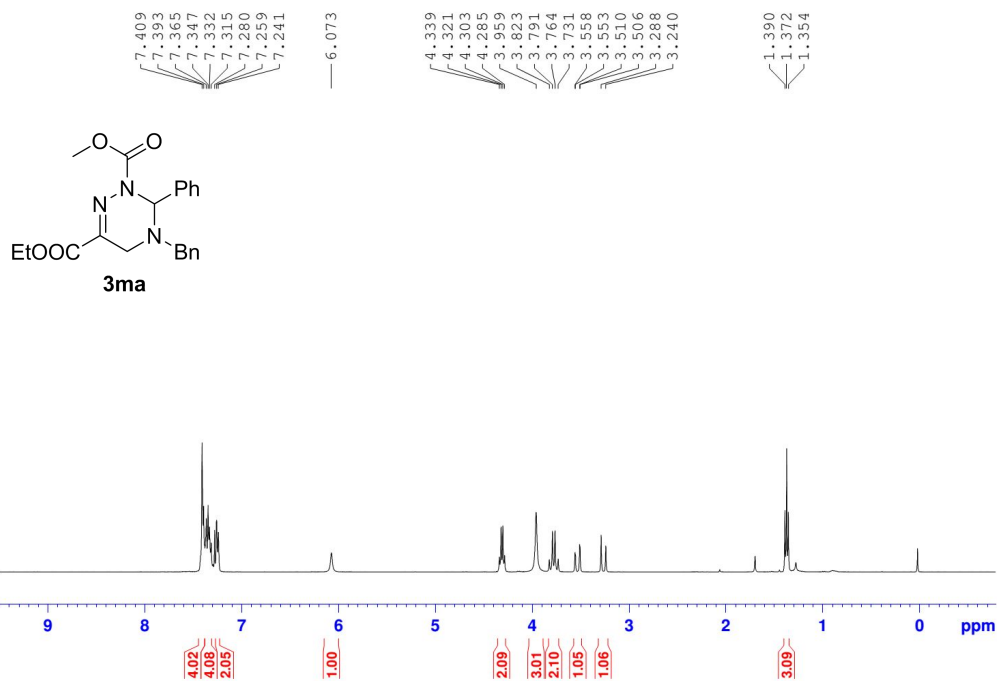

PHL-V-P14-5 13C

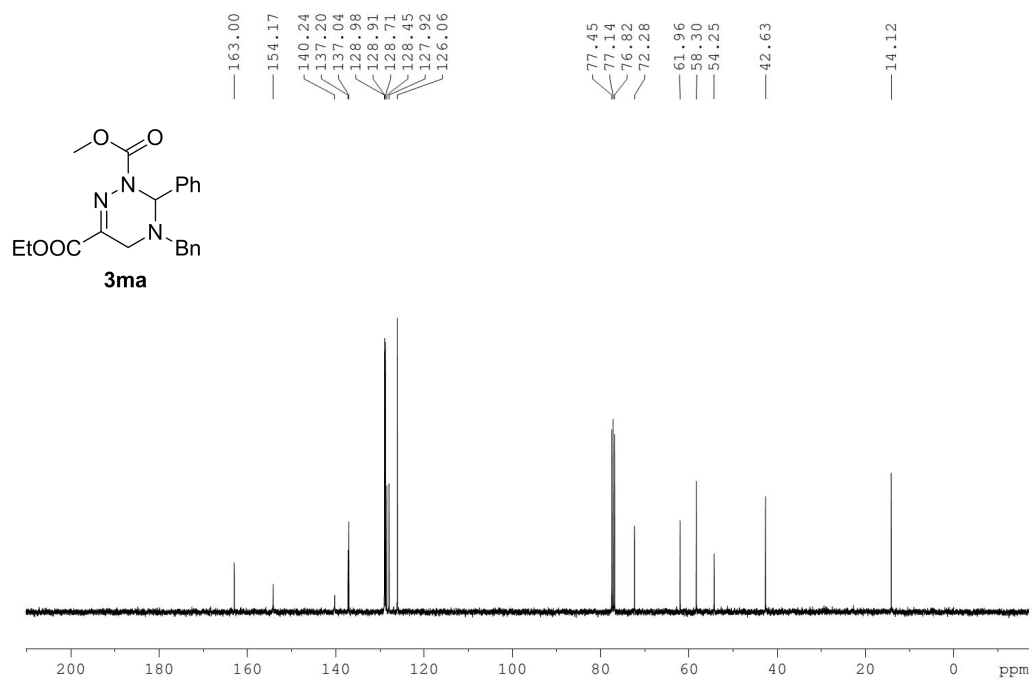

PHL-V-P14-7 NEW 1H

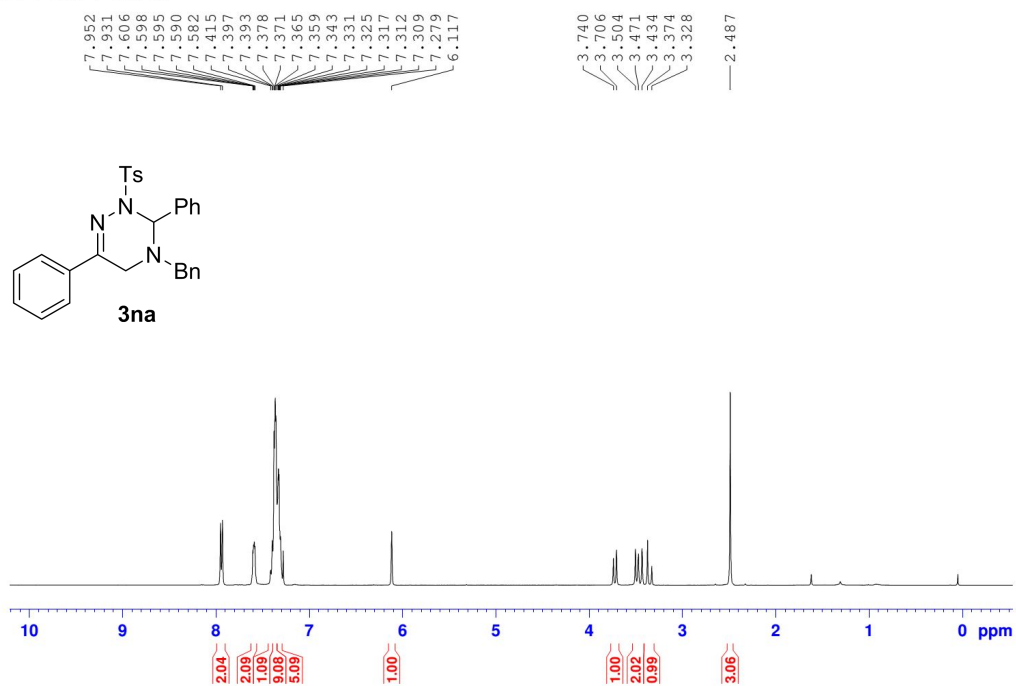

PHL-V-P14-7 13C

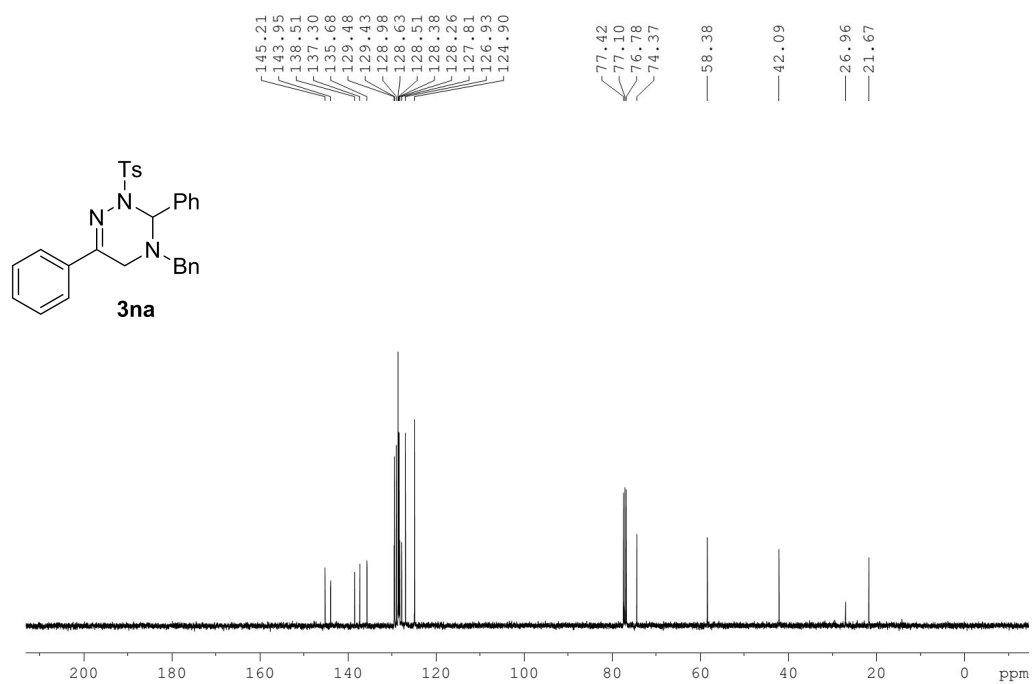

PHL-V-P21-1 NEW 1H

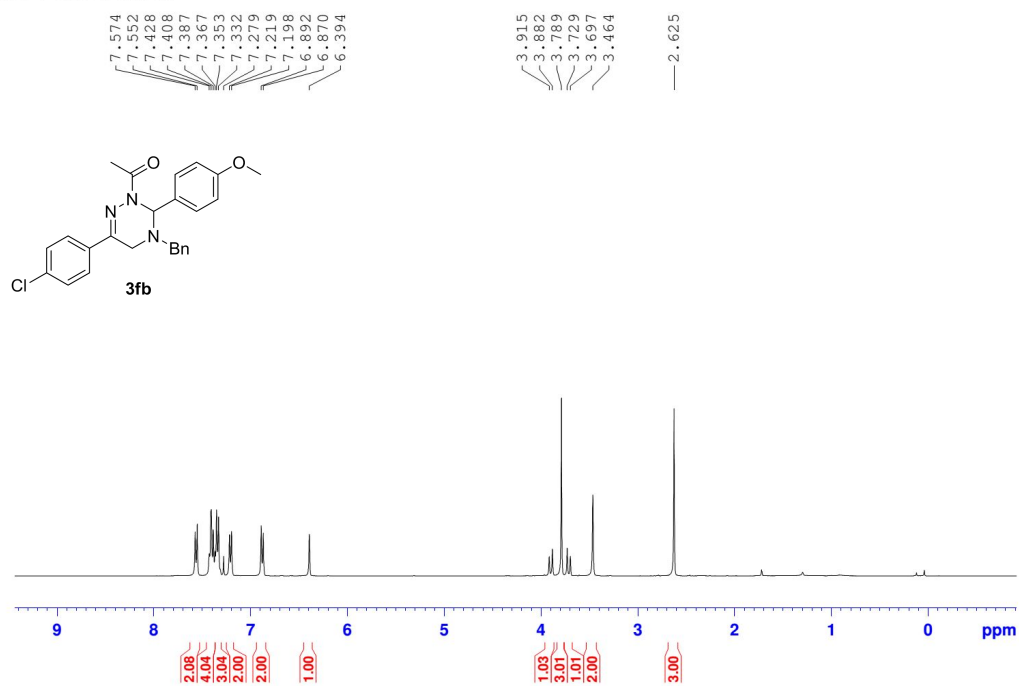

PHL-V-P21-1 13C

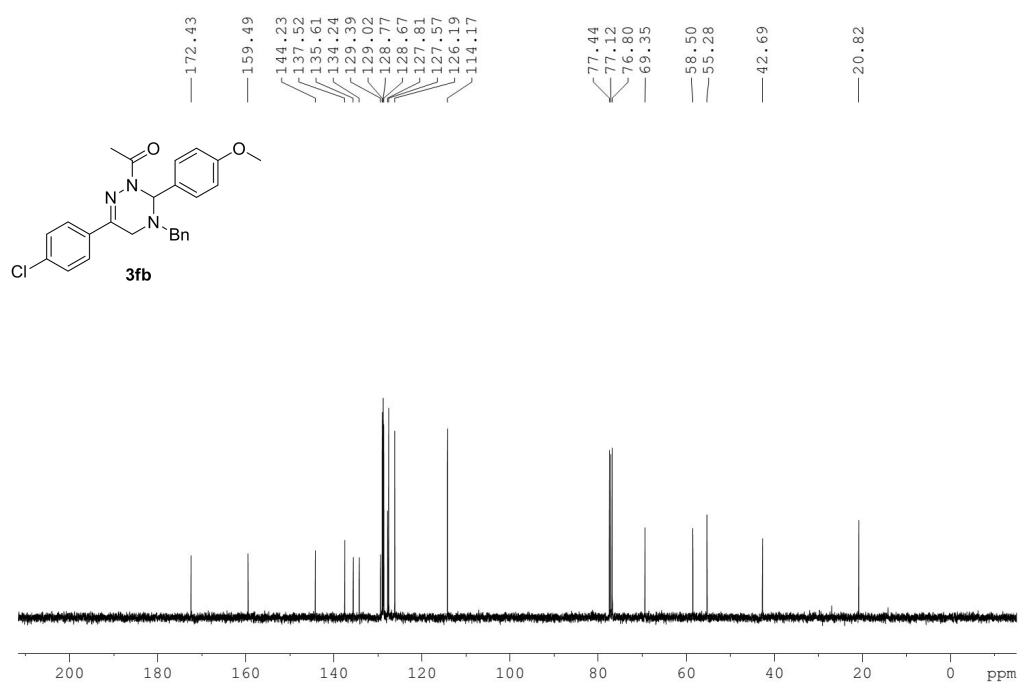

PHL-V-P21-2 NEW 1H

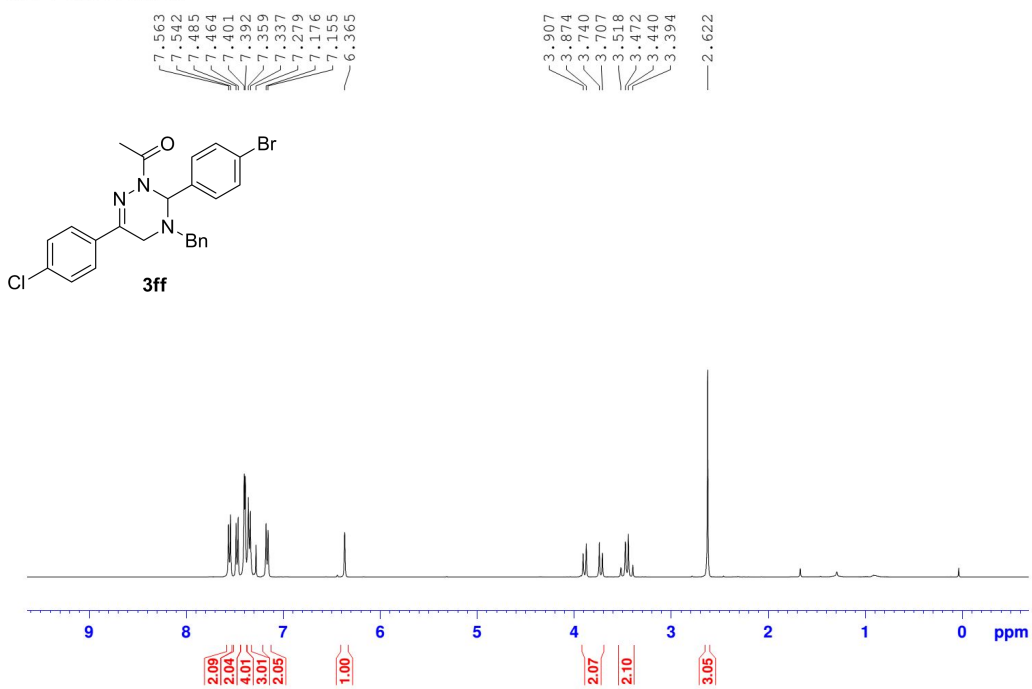

PHL-V-P21-2 13C

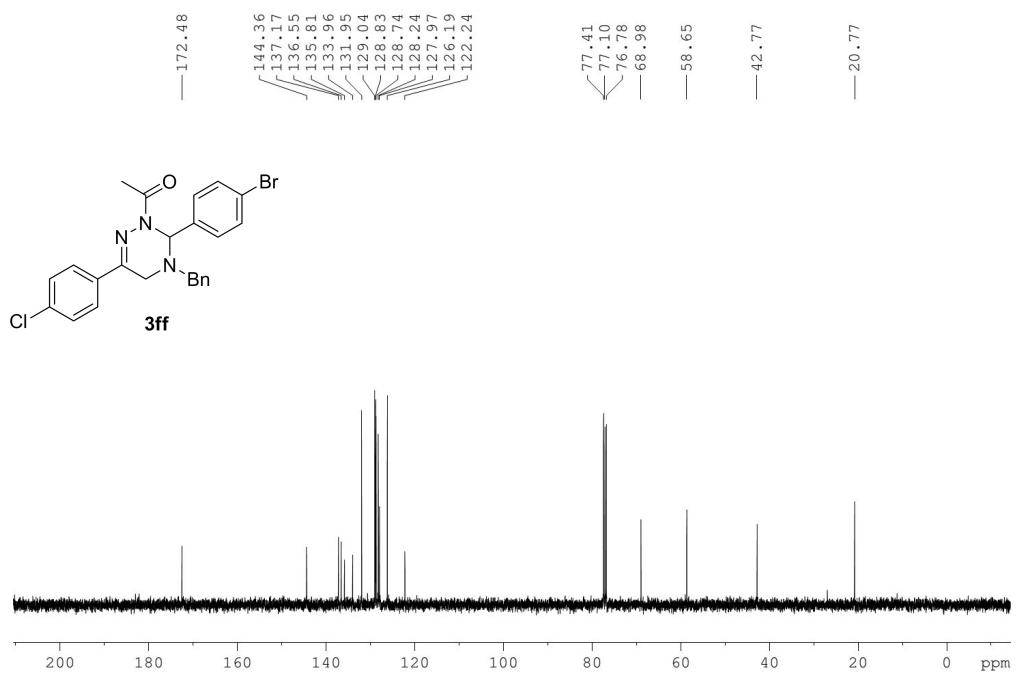

PHL-V-P21-3 NEW 1H

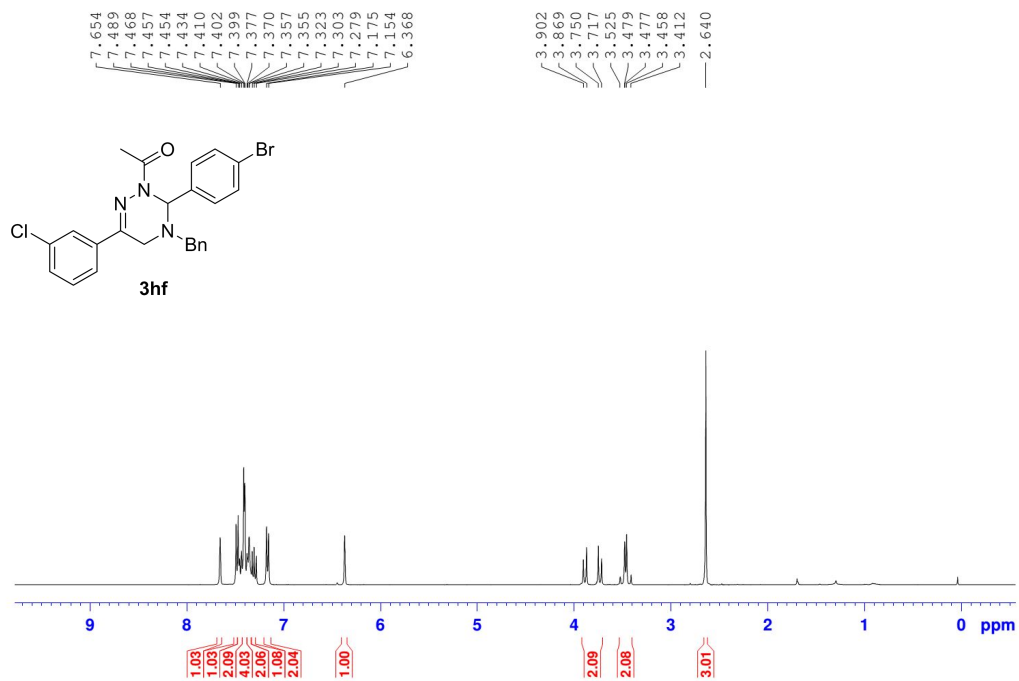

PHL-V-P21-3 13C

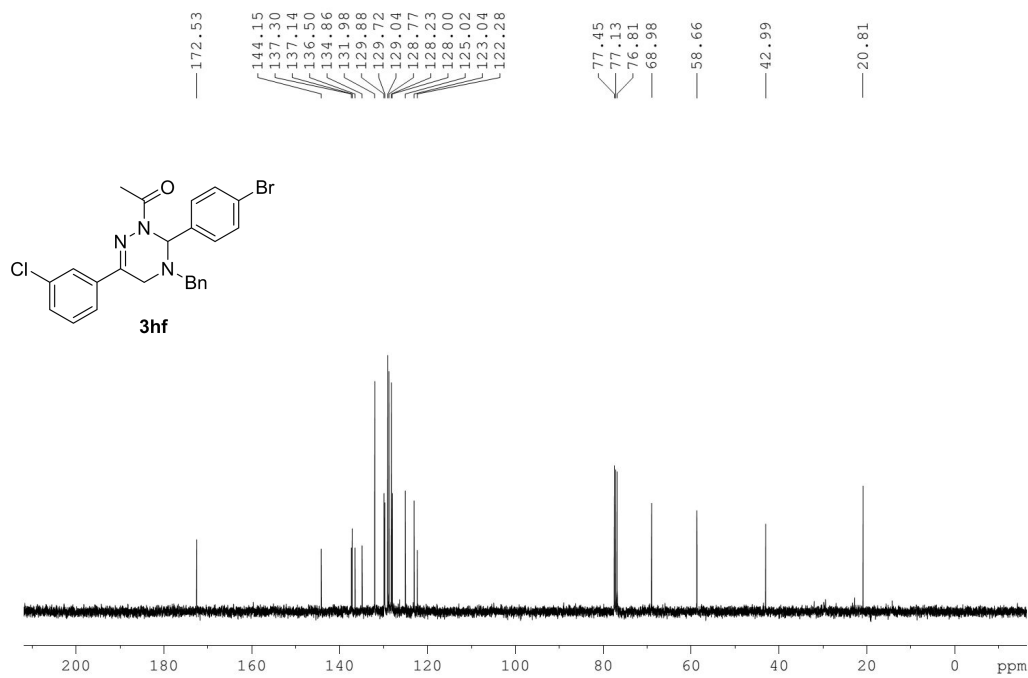

PHL-V-P21-4 NEW 1H

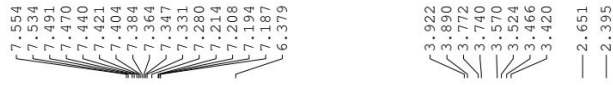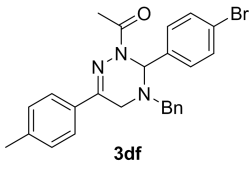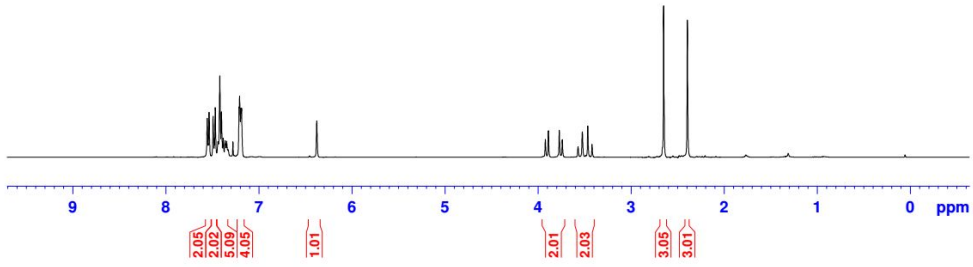

PHL-V-P21-4 NEW

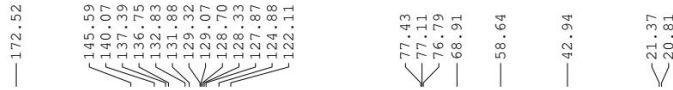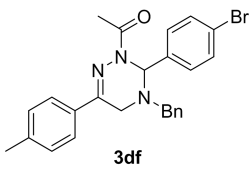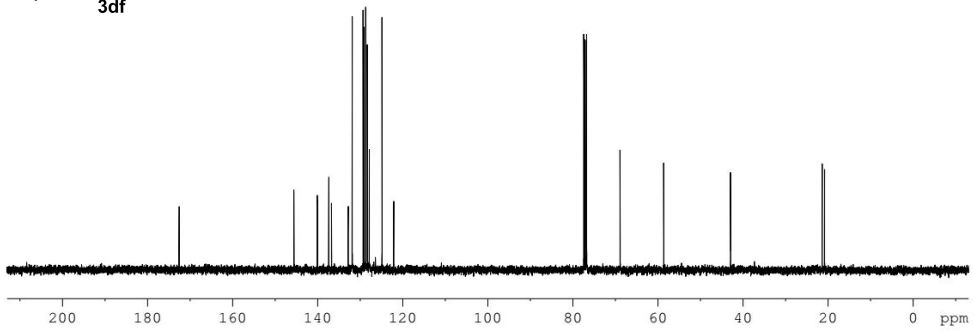

## 2. X-Ray crystal data of compound 3aa

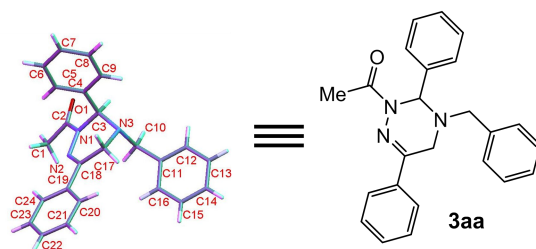

**Figure 1. X-ray single crystal structure of 3aa (with thermal ellipsoid shown at the 50% probability level)**

|                                 |                                                                                                                 |
|---------------------------------|-----------------------------------------------------------------------------------------------------------------|
| Identification code             | <b>3aa</b>                                                                                                      |
| Empirical formula               | C <sub>24</sub> H <sub>23</sub> N <sub>3</sub> O                                                                |
| Formula weight                  | 369.45                                                                                                          |
| Temperature                     | 113(2) K                                                                                                        |
| Wavelength                      | 0.71073 Å                                                                                                       |
| Crystal system, space group     | Orthorhombic, Pbc <sub>a</sub>                                                                                  |
| Unit cell dimensions            | a = 13.3996(18) Å    alpha = 90 deg.<br>b = 12.191(2) Å    beta = 90 deg.<br>c = 22.958(3) Å    gamma = 90 deg. |
| Volume                          | 3750.3(9) Å <sup>3</sup>                                                                                        |
| Z, Calculated density           | 8, 1.309 Mg/m <sup>3</sup>                                                                                      |
| Absorption coefficient          | 0.081 mm <sup>-1</sup>                                                                                          |
| F(000)                          | 1568                                                                                                            |
| Crystal size                    | 0.20 x 0.18 x 0.12 mm                                                                                           |
| Theta range for data collection | 3.04 to 27.62 deg.                                                                                              |
| Limiting indices                | -17 ≤ h ≤ 17, -15 ≤ k ≤ 15, -29 ≤ l ≤ 29                                                                        |
| Reflections collected / unique  | 45028 / 4327 [R(int) = 0.0237]                                                                                  |

|                                   |                                             |
|-----------------------------------|---------------------------------------------|
| Completeness to theta = 25.02     | 99.4%                                       |
| Absorption correction             | Semi-empirical from equivalents             |
| Max. and min. transmission        | 0.9903 and 0.9839                           |
| Refinement method                 | Full-matrix least-squares on F <sup>2</sup> |
| Data / restraints / parameters    | 4327 / 0 / 254                              |
| Goodness-of-fit on F <sup>2</sup> | 1.069                                       |
| Final R indices [I > 2σ(I)]       | R1 = 0.0343, wR2 = 0.0915                   |
| R indices (all data)              | R1 = 0.0377, wR2 = 0.0934                   |
| Largest diff. peak and hole       | 0.337 and -0.251 e.Å <sup>-3</sup>          |
